# Supplementary material for: o-Phthalaldehyde catalyzed hydrolysis of organophosphinic amides and other P(O)–NH containing compounds
Source: Royal Society of Chemistry journal article supplement (doi:10.1039/c7cc04950a), 2017-01-01
Supplement: c7cc04950a1.pdf [file c7cc04950a1.pdf]

***o*-Phthalaldehyde Catalyzed Hydrolysis of Organophosphinic Amides  
and Other P(=O)-NH Containing Compounds**

Bin-Jie Li, Ryan D. Simard, and André M. Beauchemin

*Centre for Catalysis Research and Innovation, Department of Chemistry and Biomolecular  
Sciences, University of Ottawa, 10 Marie-Curie, Ottawa, ON, K1N 6N5, Canada.*

*E-mail: andre.beauchemin@uottawa.ca.*

## Supporting Information

### Table of Contents

|                                                                                               |    |
|-----------------------------------------------------------------------------------------------|----|
| 1. General information.....                                                                   | 2  |
| 2. Synthesis and Spectral Data of Diphenylphosphinic Amides and Diphenylphosphoramidates..... | 2  |
| 3. Spectral Data of Products.....                                                             | 7  |
| 4. Details for Optimization of the Reaction Conditions.....                                   | 9  |
| 5. General Procedure for the Hydrolysis Reaction.....                                         | 13 |
| a) Isolation of diphenylphosphinic acid.....                                                  | 13 |
| b) Isolation of amine component.....                                                          | 13 |
| 6. Comparison between phthalaldehyde and formaldehyde.....                                    | 15 |
| 7. NMR spectra.....                                                                           | 19 |

## 1. General Information

Unless otherwise mentioned, all commercially available materials were purchased from Alfa Aesar, Aldrich or Combi Blocks and used without further purification. Solvents were obtained from LC Technology solvent system or distilled before using. All reactions involving moisture sensitive reactants were executed under an argon atmosphere using oven dried and/or flame dried glassware. Flash column chromatography was performed using 40 – 63  $\mu\text{m}$  Silicycle silica gel. Reactions were monitored by analytical thin layer chromatography (TLC), using glass or aluminium based plates, and cut to size. TLC visualization was achieved by UV,  $\text{I}_2$  stain and  $\text{KMnO}_4$  stain. Bruker AVANCE 300 MHz and 400 MHz spectrometers were used to obtain  $^1\text{H}$  NMR and  $^{13}\text{C}$  NMR spectra at ambient temperature. Spectral data is reported in ppm using solvents as the reference ( $\text{CDCl}_3$  at 7.26 ppm,  $\text{CD}_3\text{OD}$  at 3.31 ppm and DMSO at 2.50 ppm for  $^1\text{H}$  NMR/ $\text{CDCl}_3$  at 77.16 ppm,  $\text{CD}_3\text{OD}$  at 49.00 ppm and DMSO at 39.52 ppm for  $^{13}\text{C}$  NMR).  $^1\text{H}$  NMR data was reporting as: multiplicity (s = singlet, d = doublet, t = triplet, q = quartet, m = multiplet), coupling constant(s) in Hz, and integration. Infrared (IR) spectra were obtained as neat solids on an Agilent Cary 630 Fourier transform infrared spectrometer. Electron impact and electrospray ionisation high-resolution mass spectroscopy (EI-HRMS/ESI-HRMS) were recorded on a Kratos Concept 11-A mass spectrometer at the Ottawa-Carleton Mass Spectrometry Centre.

## 2. Synthesis and Spectral Data of Diphenylphosphinic Amides and Diphenylphosphoramidats.

Diphenylphosphinic amides and *O,O*-diphenyl phosphoramidates were synthesized according to a reported general procedure.<sup>1</sup> To a stirred solution of amines (10 mmol) in THF (25 mL) was added trimethylamine (21 mmol) at room temperature. Diphenylphosphinic chloride (12 mmol) or *O,O*-diphenyl chlorophosphate (12 mmol) in 25 mL of THF was added to the solution at 0 °C. After being stirred for 15 min at 0 °C, the reaction solution was allowed back to ambient temperature and stirred for overnight. The resulting mixture was cooled in ice bath, and diluted with  $\text{CHCl}_3$  and water. The product was extracted with  $\text{CHCl}_3$  and combined organic layer was washed by brine, 1 N HCl, saturated  $\text{NaHCO}_3$  and brine. The combined organic phases were dried over  $\text{Na}_2\text{SO}_4$  and filtered and concentrated *in vacuo*. The crude product was purified by column chromatography using  $\text{CH}_2\text{Cl}_2$ -MeOH (95:5) as eluent to give the corresponding phosphinic amides or phosphoramidates. **1a**<sup>2</sup>, **1b**<sup>3</sup>, **1c**<sup>4</sup>, **1d**<sup>5</sup>, **1f**<sup>6</sup>, **1h**<sup>7</sup>, **1i**<sup>8</sup>, **1j**<sup>9</sup>, **1k**<sup>10</sup>, **1n**<sup>11</sup>, **1s**<sup>12</sup>, **1t**<sup>13</sup>, **1z**<sup>12</sup>, **1aa**<sup>14</sup>, **1ab**<sup>15</sup> were prepared according to the known procedures and spectral data was found to be in good agreement with literature.

### *N*-Cyclopropyl-*P,P*-diphenylphosphinic amide (**1g**)

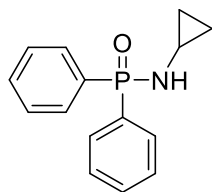

Synthesized according to general procedure. The title compound was isolated as white solid (1.49 g, 58% yield).  $^1\text{H}$  NMR (400 MHz,  $\text{CDCl}_3$ )  $\delta$  7.91 – 7.79 (m, 4H), 7.52 – 7.42 (m, 2H), 7.42 – 7.36 (m, 4H), 3.54 (s, 1H), 2.44 (tq,  $J = 7.1, 3.6$  Hz, 1H), 0.53-0.57 (m, 2H), 0.40-0.46 (m, 2H).  $^{13}\text{C}$  NMR (101 MHz,  $\text{CDCl}_3$ )  $\delta$  132.7 (d,  $J_{P-C} = 128.2$  Hz), 131.9 (d,  $J_{P-C} = 9.6$  Hz), 131.6 (d,  $J_{P-C} = 2.7$  Hz), 128.3 (d,  $J_{P-C} = 12.6$  Hz), 23.0, 7.3 (d,  $J_{P-C} = 5.1$  Hz).  $^{31}\text{P}$  NMR

(121 MHz, CDCl<sub>3</sub>)  $\delta$  20.7. IR (ATR Diamond): 3173, 3053, 1438, 1421, 1405, 1356, 1190, 1157, 1113, 1070, 1039, 1019, 1007, 995, 878, 819, 749, 721, 693 cm<sup>-1</sup>. HRMS (EI): Exact mass calculated for C<sub>15</sub>H<sub>16</sub>NOP [M]<sup>+</sup>: 257.09695, found 257.09772.

#### *N*-Propyl-*P,P*-diphenylphosphinic amide (1e)

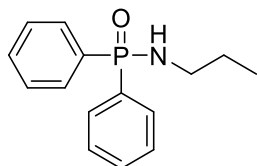

Synthesized according to general procedure. The title compound was isolated as white solid (1.40 g, 54% yield). <sup>1</sup>H NMR (300 MHz, CDCl<sub>3</sub>)  $\delta$  7.98 – 7.76 (m, 4H), 7.60 – 7.35 (m, 6H), 3.09 (s, 1H), 2.98 – 2.82 (m, 2H), 1.68 – 1.46 (m, 2H), 0.90 (t,  $J = 7.4$  Hz, 3H). <sup>13</sup>C NMR (101 MHz, CDCl<sub>3</sub>)  $\delta$  132.5 (d,  $J_{P-C} = 129.3$  Hz), 132.1 (d,  $J_{P-C} = 9.3$  Hz), 131.8 (d,  $J_{P-C} = 2.8$  Hz), 128.5 (d,  $J_{P-C} = 12.5$  Hz), 42.6 (d,  $J_{P-C} = 2.0$  Hz), 25.3 (d,  $J_{P-C} = 7.3$  Hz), 11.3. <sup>31</sup>P NMR (121 MHz, CDCl<sub>3</sub>)  $\delta$  20.6. IR (ATR Diamond): 3171, 2963, 2842, 1590, 1435, 1179, 1124, 1102, 1074, 1010, 995, 885, 842, 749, 773, 701, 692 cm<sup>-1</sup>. HRMS (EI) for: Exact mass calculated for C<sub>15</sub>H<sub>18</sub>NOP [M]<sup>+</sup>: 259.11260, found 259.11133.

#### *N*-(1-Hydroxybutan-2-yl)-*P,P*-diphenylphosphinic amide (1l)

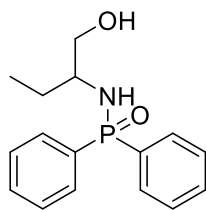

Synthesized according to general procedure. The title compound was isolated as white solid (1.62 g, 56% yield). <sup>1</sup>H NMR (400 MHz, CDCl<sub>3</sub>)  $\delta$  7.97 – 7.80 (m, 4H), 7.55 – 7.35 (m, 6H), 4.85 (s, 1H), 3.62 (dd,  $J = 11.7, 2.6$  Hz, 1H), 3.43 (dd,  $J = 11.6, 7.3$  Hz, 1H), 3.13 (s, 1H), 2.99 – 2.80 (m, 1H), 1.65 – 1.35 (m, 2H), 0.96 (t,  $J = 7.5$  Hz, 3H). <sup>13</sup>C NMR (101 MHz, CDCl<sub>3</sub>)  $\delta$  132.6 (d,  $J_{P-C} = 9.5$  Hz), 132.3 (d,  $J_{P-C} = 148.2$  Hz), 132.0 (d,  $J_{P-C} = 2.5$  Hz), 131.9 (d,  $J_{P-C} = 2.6$  Hz), 131.7 (d,  $J_{P-C} = 9.4$  Hz), 130.2, 128.6 (d,  $J_{P-C} = 1.5$  Hz), 128.5 (d,  $J_{P-C} = 1.8$  Hz), 67.0, 56.8 (d,  $J_{P-C} = 2.2$  Hz), 26.5 (d,  $J_{P-C} = 9.6$  Hz), 10.8. <sup>31</sup>P NMR (121 MHz, CDCl<sub>3</sub>)  $\delta$  23.7. IR (ATR Diamond): 3249, 3187, 1142, 1436, 1169, 1112, 1093, 1063, 1021, 995, 946, 873, 851, 754, 748, 724, 694 cm<sup>-1</sup>. HRMS (ESI) for: Exact mass calculated for C<sub>16</sub>H<sub>21</sub>NO<sub>2</sub>P [M+H]<sup>+</sup> 290.1310, found 290.1300.

#### Diphenyl methylphosphoramidate (1u)

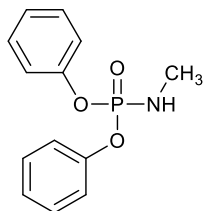

Synthesized according to general procedure. The title compound was isolated as yellow solid (1.58 g, 60% yield). <sup>1</sup>H NMR (400 MHz, CDCl<sub>3</sub>)  $\delta$  7.37 – 7.31 (m, 4H), 7.26 (dq,  $J = 7.9, 1.2$  Hz, 5H), 7.21 – 7.14 (m, 2H), 3.03 (s, 1H), 2.76 (d,  $J = 12.5$  Hz, 3H). <sup>13</sup>C NMR (75 MHz, CDCl<sub>3</sub>)  $\delta$  150.7 (d,  $J_{P-C} = 6.7$  Hz), 129.7, 124.9, 120.2 (d,  $J_{P-C} = 4.7$  Hz), 27.9. <sup>31</sup>P NMR (121 MHz, CDCl<sub>3</sub>)  $\delta$  0.42. IR (ATR Diamond): 3244, 3069, 2928, 2824, 1587, 1488, 1456, 1424, 1256, 1227, 1104, 1163, 1110, 1081, 1024, 1008, 949, 926, 905, 857, 750, 687, 613, 591, 568 cm<sup>-1</sup>. HRMS (EI) for: Exact mass calculated for C<sub>13</sub>H<sub>14</sub>NO<sub>3</sub>P [M]<sup>+</sup>: 263.07113, found 263.07396.

### Diphenyl isopropylphosphoramidate (1w)

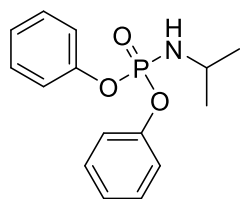

Synthesized according to general procedure. The title compound was isolated as white solid (2.03 g, 70% yield).  $^1\text{H}$  NMR (400 MHz,  $\text{CDCl}_3$ )  $\delta$  7.34 – 7.27 (m, 4H), 7.24 – 7.26 (m, 4H), 7.16 – 7.10 (m, 2H), 3.65 – 3.51 (m, 1H), 2.99 (t,  $J$  = 11.0 Hz, 1H), 1.14 (d,  $J$  = 1.0 Hz, 3H), 1.13 (d,  $J$  = 1.0 Hz, 3H).  $^{13}\text{C}$  NMR (101 MHz,  $\text{CDCl}_3$ )  $\delta$  150.9 (d,  $J_{P-C}$  = 6.9 Hz), 129.6, 124.7 (d,  $J_{P-C}$  = 1.1 Hz), 120.2 (d,  $J_{P-C}$  = 5.1 Hz), 44.5, 25.1 (d,  $J_{P-C}$  = 5.8 Hz).  $^{31}\text{P}$  NMR (121 MHz,  $\text{CDCl}_3$ )  $\delta$  -4.6. IR (ATR Diamond): 3261, 2967, 1590, 1484, 1464, 1422, 1385, 1369, 1245, 1220, 1191, 1163, 1144, 1126, 1042, 1026, 924, 906, 767, 751, 691  $\text{cm}^{-1}$ . HRMS (ESI) for: Exact mass calculated for  $\text{C}_{15}\text{H}_{18}\text{NO}_3\text{PNa}$   $[\text{M}+\text{Na}]^+$  314.0922, found 314.0933

### Diphenyl cyclopropylphosphoramidate (1x)

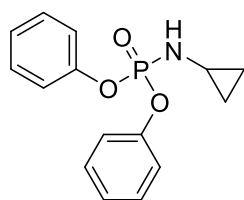

Synthesized according to general procedure. The title compound was isolated as white solid (2.60 g, 90% yield).  $^1\text{H}$  NMR (300 MHz,  $\text{CDCl}_3$ )  $\delta$  7.31 (dd,  $J$  = 8.7, 6.9 Hz, 4H), 7.26 – 7.20 (m, 4H), 7.19 – 7.09 (m, 2H), 3.65 (d,  $J$  = 14.9 Hz, 1H), 2.43 – 2.51 (m, 1H), 0.74 – 0.41 (m, 4H).  $^{13}\text{C}$  NMR (101 MHz,  $\text{CDCl}_3$ )  $\delta$  150.8 (d,  $J_{P-C}$  = 6.6 Hz), 129.6, 124.8 (d,  $J_{P-C}$  = 1.1 Hz), 120.1 (d,  $J_{P-C}$  = 5.1 Hz), 23.2, 7.1 (d,  $J_{P-C}$  = 5.3 Hz).  $^{31}\text{P}$  NMR (121 MHz,  $\text{CDCl}_3$ )  $\delta$  -3.6. IR (ATR Diamond): 3218, 1591, 1483, 1453, 1433, 1417, 1249, 1209, 1190, 1176, 1162, 1101, 1025, 1005, 929, 903, 777, 766, 752, 691  $\text{cm}^{-1}$ . HRMS (ESI) for: Exact mass calculated for  $\text{C}_{15}\text{H}_{16}\text{NO}_3\text{PNa}$   $[\text{M}+\text{Na}]^+$  312.0766, found 312.0774.

### Diphenyl propylphosphoramidate (1v)

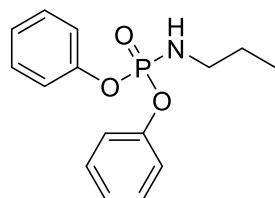

Synthesized according to general procedure. The title compound was isolated as white solid (2.47 g, 85% yield).  $^1\text{H}$  NMR (400 MHz,  $\text{CDCl}_3$ )  $\delta$  7.31 (t,  $J$  = 7.9 Hz, 4H), 7.25 (d,  $J$  = 3.5 Hz, 3H), 7.23 (s, 1H), 7.14 (t,  $J$  = 7.4 Hz, 2H), 3.12 – 3.00 (m, 2H), 2.98 (d,  $J$  = 14.0 Hz, 1H), 1.48 (h,  $J$  = 7.3 Hz, 2H), 0.86 (t,  $J$  = 7.4 Hz, 3H).  $^{13}\text{C}$  NMR (101 MHz,  $\text{CDCl}_3$ )  $\delta$  150.9 (d,  $J_{P-C}$  = 6.7 Hz), 129.6, 124.9, 120.2 (d,  $J_{P-C}$  = 5.0 Hz), 43.6, 24.7 (d,  $J_{P-C}$  = 6.3 Hz), 11.0.  $^{31}\text{P}$  NMR (121 MHz,  $\text{CDCl}_3$ )  $\delta$  -3.3. IR (ATR Diamond): 3174, 3055, 2963, 2932, 2875, 1589, 1486, 1456, 1250, 1233, 1213, 1187, 1167, 1104, 1069, 1036, 1021, 1006, 949, 927, 915, 773, 749, 688, 586, 545  $\text{cm}^{-1}$ . HRMS (ESI): Exact mass calculated for  $\text{C}_{15}\text{H}_{18}\text{NO}_3\text{PNa}$   $[\text{M}+\text{Na}]^+$  314.0922, found 314.0920.

### Diphenyl *tert*-butylphosphoramidate (1y)

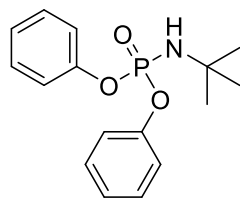

Synthesized according to general procedure. The title compound was isolated as white solid (2.28g, 75% yield).  $^1\text{H}$  NMR (400 MHz,  $\text{CDCl}_3$ )  $\delta$  7.34 – 7.27 (m, 4H), 7.24 (dq,  $J$  = 7.4, 1.2 Hz, 4H), 7.10 – 7.13 (m, 2H), 3.24 (s, 1H), 1.32 (s, 9H).  $^{13}\text{C}$  NMR (101 MHz,  $\text{CDCl}_3$ )  $\delta$  151.1 (d,  $J_{P-C}$  = 7.0 Hz), 129.5, 124.6 (d,  $J_{P-C}$  = 1.3 Hz), 120.1 (d,  $J_{P-C}$  = 5.2 Hz), 51.7 (d,  $J_{P-C}$  = 1.5 Hz), 31.2 (d,  $J_{P-C}$  = 4.9 Hz).  $^{31}\text{P}$  NMR (121 MHz,  $\text{CDCl}_3$ )  $\delta$  -6.2. IR (ATR

Diamond): 3264, 2974, 1588, 1484, 1409, 1388, 1365, 1260, 1219, 1192, 1156, 1047, 1021, 923, 867, 784, 757, 721, 690  $\text{cm}^{-1}$ . HRMS (ESI): Exact mass calculated for  $\text{C}_{16}\text{H}_{21}\text{NO}_3\text{P}$   $[\text{M}+\text{H}]^+$  306.1255, found 306.1259

### Methyl (diphenylphosphoryl)phenylalaninate (1p)

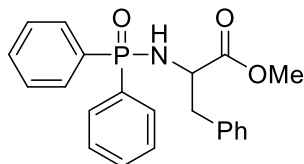

Synthesized according to general procedure. The title compound was isolated as white solid (2.27g, 60% yield).  $^1\text{H}$  NMR (400 MHz,  $\text{CDCl}_3$ )  $\delta$  7.83-7.78 (m, 2H), 7.69-7.63 (m, 2H), 7.51 – 7.38 (m, 4H), 7.36-7.32 (m, 2H), 7.30 – 7.22 (m, 3H), 7.13 (dd,  $J = 7.7, 1.8$  Hz, 2H), 4.09-4.01 (m, 1H), 3.64 (s, 3H), 3.49 (dd,  $J = 11.2, 6.9$  Hz, 1H), 3.08 (dd,  $J = 6.0, 1.8$  Hz, 2H).  $^{13}\text{C}$  NMR (101 MHz,  $\text{CDCl}_3$ )  $\delta$  173.2 (d,  $J_{\text{P-C}} = 5.6$  Hz), 135.9, 132.6 (d,  $J_{\text{P-C}} = 11.7$  Hz), 132.1 (d,  $J_{\text{P-C}} = 9.7$  Hz), 132.0 (d,  $J_{\text{P-C}} = 2.8$  Hz), 131.9 (d,  $J_{\text{P-C}} = 9.8$  Hz), 131.9 (d,  $J_{\text{P-C}} = 2.8$  Hz), 131.3 (d,  $J_{\text{P-C}} = 10.1$  Hz), 129.7, 128.5 (d,  $J_{\text{P-C}} = 2.7$  Hz), 128.5 (d,  $J_{\text{P-C}} = 22.8$  Hz), 128.5, 127.0, 54.7, 52.2, 41.2 (d,  $J_{\text{P-C}} = 5.0$  Hz).  $^{31}\text{P}$  NMR (121 MHz,  $\text{CDCl}_3$ )  $\delta$  20.3 IR (ATR Diamond): 3145, 1732, 1659, 1591, 1433, 1282, 1243, 1182, 1125, 1108, 1096, 1043, 1016, 940, 918, 748, 726, 691  $\text{cm}^{-1}$ . HRMS (ESI) for: Exact mass calculated for  $\text{C}_{22}\text{H}_{22}\text{NO}_3\text{PNa}$   $[\text{M}+\text{Na}]^+$  402.1235, found 402.1241.

### *N*-Allyl-*P,P*-di-*o*-tolylphosphinic amide (1m)

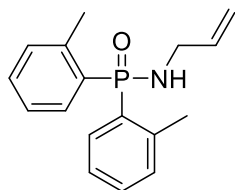

Synthesized according to general procedure. The title compound was isolated as white solid (1.99 g, 70% yield).  $^1\text{H}$  NMR (400 MHz,  $\text{CDCl}_3$ )  $\delta$  7.73-7.67 (m, 2H), 7.40-7.35 (m, 2H), 7.24 – 7.16 (m, 4H), 6.03-5.93 (m, 1H), 5.33 – 5.04 (m, 2H), 3.70-3.64 (m, 2H), 2.73 (d,  $J = 7.4$  Hz, 1H), 2.46 (s, 6H).  $^{13}\text{C}$  NMR (101 MHz,  $\text{CDCl}_3$ )  $\delta$  142.3 (d,  $J_{\text{P-C}} = 9.9$  Hz), 136.5 (d,  $J_{\text{P-C}} = 7.3$  Hz), 132.9 (d,  $J_{\text{P-C}} = 10.7$  Hz), 131.8, 131.7 (d,  $J_{\text{P-C}} = 15.2$  Hz), 131.0 (d,  $J_{\text{P-C}} = 123.5$  Hz), 125.4 (d,  $J_{\text{P-C}} = 12.6$  Hz), 115.8, 43.5, 21.5 (d,  $J_{\text{P-C}} = 4.0$  Hz).  $^{31}\text{P}$  NMR (121 MHz,  $\text{CDCl}_3$ )  $\delta$  25.5. IR (ATR Diamond): 3117, 3062, 1645, 1591, 1452, 1433, 1275, 1201, 1166, 1136, 1076, 1030, 998, 910, 866, 806, 762, 716, 691, 671  $\text{cm}^{-1}$ . HRMS (ESI): Exact mass calculated for  $\text{C}_{17}\text{H}_{20}\text{NOPNa}$   $[\text{M}+\text{Na}]^+$  308.1180, found 308.1181.

### Naphthalen-1-yl-*N*-allyl-*P*-phenylphosphonamidate (1r)

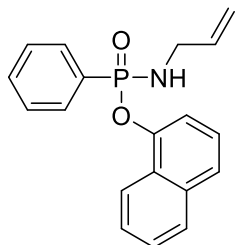

Synthesized according to general procedure. The title compound was isolated as white solid (2.58 g, 80% yield).  $^1\text{H}$  NMR (400 MHz,  $\text{CDCl}_3$ )  $\delta$  8.18 – 8.10 (m, 1H), 8.03 – 7.92 (m, 2H), 7.87 – 7.78 (m, 1H), 7.61 (dd,  $J = 7.9, 1.2$  Hz, 2H), 7.59 – 7.52 (m, 1H), 7.48 (ddt,  $J = 8.3, 6.9, 2.8$  Hz, 4H), 7.35 (t,  $J = 8.0$  Hz, 1H), 5.67 (ddt,  $J = 17.2, 10.6, 5.5$  Hz, 1H), 5.23 – 4.78 (m, 2H), 3.57 (ddt,  $J = 9.2, 5.5, 1.6$  Hz, 2H), 3.03 (s, 1H).  $^{13}\text{C}$  NMR (101 MHz,  $\text{CDCl}_3$ )  $\delta$  146.7 (d,  $J_{\text{P-C}} = 8.4$  Hz), 135.5 (d,  $J_{\text{P-C}} = 6.3$  Hz), 134.8, 132.3 (d,  $J_{\text{P-C}} = 3.2$  Hz), 131.4 (d,  $J_{\text{P-C}} = 10.0$  Hz), 131.2, 129.4, 128.6 (d,  $J_{\text{P-C}} = 14.7$  Hz), 127.9, 126.6 (d,  $J_{\text{P-C}} = 5.9$  Hz), 126.3 (d,  $J_{\text{P-C}} = 28.5$  Hz), 125.7 (d,  $J_{\text{P-C}} = 0.9$  Hz), 124.3, 121.5, 115.9, 115.3 (d,  $J_{\text{P-C}} = 4.0$  Hz), 43.6.  $^{31}\text{P}$  NMR (121 MHz,  $\text{CDCl}_3$ )  $\delta$  17.8. IR

(ATR Diamond): 3207, 1574, 1462, 1437, 1392, 1262, 1214, 1125, 1077, 1046, 913, 853, 795, 771, 750, 718, 694  $\text{cm}^{-1}$ . HRMS (ESI): Exact mass calculated for  $\text{C}_{19}\text{H}_{18}\text{NO}_2\text{PNa}$   $[\text{M}+\text{Na}]^+$  346.0973, found 346.0971.

### Benzyl 2-((diphenylphosphoryl)amino)-2-phenylacetate (1o)

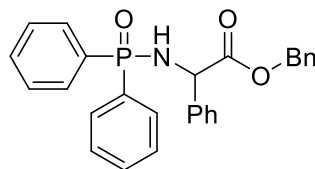

Synthesized according to general procedure. The title compound was isolated as white solid (2.96 g, 67% yield).  $^1\text{H}$  NMR (400 MHz,  $\text{CDCl}_3$ )  $\delta$  7.90 – 7.81 (m, 2H), 7.78 – 7.70 (m, 2H), 7.54 – 7.48 (m, 1H), 7.47 – 7.40 (m, 3H), 7.34 – 7.26 (m, 10H), 7.17 – 7.11 (m, 2H), 5.16 – 5.09 (m, 2H), 4.99 (dd,  $J = 10.7, 9.7$  Hz, 1H), 4.30 (dd,  $J = 9.7, 6.6$  Hz, 1H).  $^{13}\text{C}$  NMR (101 MHz,  $\text{CDCl}_3$ )  $\delta$  172.0 (d,  $J_{\text{P-C}} = 5.7$  Hz), 138.1 (d,  $J_{\text{P-C}} = 4.4$  Hz), 135.1, 132.5 (d,  $J_{\text{P-C}} = 48.5$  Hz), 132.3 (d,  $J_{\text{P-C}} = 9.8$  Hz), 132.1 (d,  $J_{\text{P-C}} = 2.8$  Hz), 131.9, 131.9 (d,  $J_{\text{P-C}} = 9.6$  Hz), 131.2 (d,  $J_{\text{P-C}} = 51.7$  Hz), 129.2, 128.6 (d,  $J_{\text{P-C}} = 12.7$  Hz), 128.6 (d,  $J_{\text{P-C}} = 23.9$  Hz), 128.3 (d,  $J_{\text{P-C}} = 24.4$  Hz), 128.3, 128.1, 127.9, 127.0, 67.5, 57.0. IR (ATR Diamond): 3059, 1743, 1591, 1538, 1436, 1248, 1222, 1160, 1065, 1040, 1019, 955, 741, 754, 717, 692  $\text{cm}^{-1}$ . HRMS (ESI): Exact mass calculated for  $\text{C}_{27}\text{H}_{25}\text{NO}_3\text{P}$   $[\text{M}+\text{H}]^+$  442.1572, found 442.1594.

### Benzyl (diphenylphosphoryl)phenylalaninate (1q)

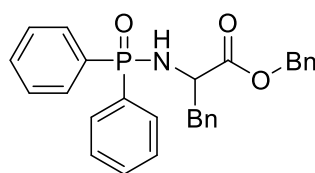

Synthesized according to general procedure. The title compound was isolated as white solid (3.19 g, 70% yield).  $^1\text{H}$  NMR (300 MHz,  $\text{CD}_3\text{OD}$ )  $\delta$  7.82 – 7.66 (m, 2H), 7.61 – 7.40 (m, 6H), 7.40 – 7.23 (m, 10H), 7.21 – 7.11 (m, 2H), 5.17 – 4.98 (m, 2H), 3.85 (td,  $J = 8.4, 6.5$  Hz, 1H), 3.17 – 2.94 (m, 2H).  $^{13}\text{C}$  NMR (75 MHz,  $\text{CD}_3\text{OD}$ )  $\delta$  172.8 (d,  $J_{\text{P-C}} = 3.2$  Hz), 136.9, 135.7, 132.5, 132.0 (d,  $J_{\text{P-C}} = 2.7$  Hz), 131.9, 131.8, 131.7 (d,  $J_{\text{P-C}} = 1.4$  Hz), 131.6, 130.7, 130.1, 129.4, 128.3, 128.1, 128.1 (d,  $J_{\text{P-C}} = 1.8$  Hz), 127.9, 126.6, 66.5, 55.7, 40.1 (d,  $J_{\text{P-C}} = 7.2$  Hz).  $^{31}\text{P}$  NMR (121 MHz,  $\text{CDCl}_3$ )  $\delta$  22.93. IR (ATR Diamond): 3172, 3059, 1738, 1434, 1383, 1159, 1177, 1125, 1106, 1091, 919, 902, 742, 727, 693  $\text{cm}^{-1}$ . HRMS (ESI): Exact mass calculated for  $\text{C}_{28}\text{H}_{26}\text{NO}_3\text{PNa}$   $[\text{M}+\text{Na}]^+$  478.1548, found 478.1541.

### Diphenyl diallylphosphoramidate

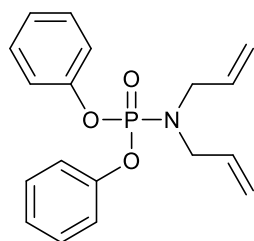

Synthesized according to general procedure. The title compound was isolated as white solid (2.87 g, 87% yield).  $^1\text{H}$  NMR (300 MHz,  $\text{CDCl}_3$ )  $\delta$  7.38 – 7.09 (m, 10H), 5.56 (ddt,  $J = 17.5, 9.7, 6.3$  Hz, 2H), 5.19 – 5.07 (m, 4H), 3.75 (ddt,  $J = 11.3, 6.3, 1.3$  Hz, 4H).  $^{13}\text{C}$  NMR (101 MHz,  $\text{CDCl}_3$ )  $\delta$  151.19 (d,  $J_{\text{P-C}} = 6.7$  Hz), 133.94 (d,  $J_{\text{P-C}} = 2.6$  Hz), 129.92, 125.12 (d,  $J_{\text{P-C}} = 1.1$  Hz), 120.52 (d,  $J_{\text{P-C}} = 5.0$  Hz), 118.78, 48.12 (d,  $J_{\text{P-C}} = 4.4$  Hz).  $^{31}\text{P}$  NMR (121 MHz,  $\text{CDCl}_3$ )  $\delta$  -2.77. IR (ATR Diamond): 3452, 1588, 1485, 1254, 1227, 1186, 1162, 1111, 1085, 1023, 993, 923, 910, 775, 762, 613  $\text{cm}^{-1}$ . HRMS (EI): Exact mass calculated for  $\text{C}_{18}\text{H}_{20}\text{NO}_3\text{P}$   $[\text{M}]^+$ : 329.11808, found 329.11611

## Morpholinodiphenylphosphine oxide

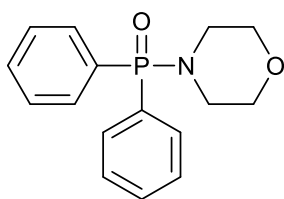

Synthesized according to general procedure. The title compound was isolated as colorless solid (1.60 g, 56 % yield).  $^1\text{H}$  NMR (300 MHz,  $\text{CD}_3\text{OD}$ )  $\delta$  8.02 – 7.73 (m, 1H), 7.69 – 7.24 (m, 1H), 3.77 – 3.58 (m, 1H), 3.09 – 2.94 (m, 1H).  $^{13}\text{C}$  NMR (75MHz,  $\text{CD}_3\text{OD}$ ):  $\delta$  133.72 (d,  $J_{P-C}$  = 2.8 Hz), 133.45 (d,  $J_{P-C}$  = 9.4 Hz), 131.20 (d,  $J_{P-C}$  = 131.4 Hz), 130.14 (d,  $J_{P-C}$  = 12.7 Hz), 68.05 (d,  $J_{P-C}$  = 6.6 Hz), 46.19.  $^{31}\text{P}$  NMR (121 MHz,  $\text{CDCl}_3$ )  $\delta$  28.6. IR (ATR Diamond): 3053, 2961, 2848, 1723, 1440, 1367, 1294, 1255, 1196, 1111, 1082, 1067, 1019, 957, 914, 846, 764, 702, 694, 669, 611, 598, 552  $\text{cm}^{-1}$ . HRMS (ESI): Exact mass calculated for  $\text{C}_{16}\text{H}_{18}\text{NO}_2\text{PNa}$   $[\text{M}+\text{Na}]^+$  310.0973, found 310.0983.

## 3. Spectral Data of Products.

### Diphenylphosphinic acid

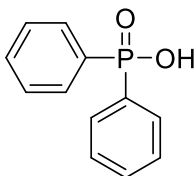

White solid,  $^1\text{H}$  NMR (400 MHz,  $\text{CD}_3\text{OD}$ )  $\delta$  7.85 – 7.71 (m, 4H), 7.59 – 7.50 (m, 2H), 7.50 – 7.41 (m, 4H).  $^{13}\text{C}$  NMR (101 MHz,  $\text{CD}_3\text{OD}$ )  $\delta$  133.1 (d,  $J_{P-C}$  = 138.4 Hz), 131.8 (d,  $J_{P-C}$  = 2.9 Hz), 130.9 (d,  $J_{P-C}$  = 10.3 Hz), 128.2 (d,  $J_{P-C}$  = 13.2 Hz). Spectral data is in good agreement with literature data.<sup>16</sup>

### Diphenyl hydrogen phosphate

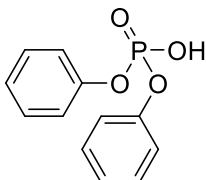

White solid,  $^1\text{H}$  NMR (300 MHz,  $\text{CD}_3\text{OD}$ )  $\delta$  7.34 (dddd,  $J$  = 9.0, 6.5, 1.2, 0.6 Hz, 4H), 7.23 – 7.13 (m, 6H).  $^{13}\text{C}$  NMR (101 MHz,  $\text{CDCl}_3$ )  $\delta$  150.3 (d,  $J_{P-C}$  = 7.1 Hz), 129.7, 125.4, 120.2 (d,  $J_{P-C}$  = 4.9 Hz). Spectral data is in good agreement with literature data.<sup>17</sup>

### Di-*o*-tolylphosphinic acid

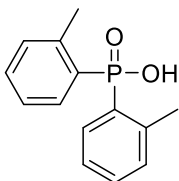

colorless oil.  $^1\text{H}$  NMR (400 MHz,  $\text{CD}_3\text{OD}$ )  $\delta$  7.94-7.88 (m, 2H), 7.44 (tt,  $J$  = 7.6, 1.5 Hz, 2H), 7.33-7.28 (m, 2H), 7.26 – 7.18 (m, 2H), 2.27 (s, 6H).  $^{13}\text{C}$  NMR (101 MHz,  $\text{CD}_3\text{OD}$ )  $\delta$  141.1 (d,  $J_{P-C}$  = 11.4 Hz), 132.5 (d,  $J_{P-C}$  = 9.8 Hz), 132.1, 132.0, 131.1 (d,  $J_{P-C}$  = 12.5 Hz), 125.2 (d,  $J_{P-C}$  = 12.6 Hz), 20.0 (d,  $J_{P-C}$  = 4.6 Hz).  $^{31}\text{P}$  NMR (121 MHz,  $\text{CD}_3\text{OD}$ )  $\delta$  25.56. IR (ATR Diamond): 3183, 2919, 2848, 1645, 1594, 1276, 939, 715, 699  $\text{cm}^{-1}$ . HRMS (ESI): Exact mass calculated for  $\text{C}_{14}\text{H}_{15}\text{O}_2\text{PNa}$   $[\text{M}+\text{Na}]^+$  269.0707, found 269.0726.



### Naphthalen-1-yl hydrogen phenyl phosphonate

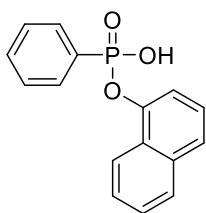

colorless oil,  $^1\text{H}$  NMR (400 MHz,  $\text{CDCl}_3$ )  $\delta$  11.50 (s, 1H), 8.06 (dd,  $J = 8.3$ , 1.2 Hz, 1H), 7.89-7.83 (m, 2H), 7.78 – 7.71 (m, 1H), 7.56 – 7.46 (m, 2H), 7.45 – 7.28 (m, 5H), 7.16 (t,  $J = 7.9$  Hz, 1H).  $^{13}\text{C}$  NMR (101 MHz,  $\text{CDCl}_3$ )  $\delta$  146.4 (d,  $J_{P-C} = 8.4$  Hz), 134.7, 132.7 (d,  $J_{P-C} = 3.1$  Hz), 131.5 (d,  $J_{P-C} = 10.4$  Hz), 129.0, 128.4 (d,  $J_{P-C} = 15.8$  Hz), 127.5, 127.0, 126.8 (d,  $J_{P-C} = 5.4$  Hz), 126.3 (d,  $J_{P-C} = 32.6$  Hz), 125.4 (d,  $J_{P-C} = 1.6$  Hz), 124.7 (d,  $J_{P-C} = 1.5$  Hz), 122.1, 115.6 (d,  $J_{P-C} = 3.6$  Hz).  $^{31}\text{P}$  NMR (121 MHz,  $\text{CDCl}_3$ )  $\delta$  17.3. IR (ATR Diamond): 3056, 1595, 1574, 1507, 1462, 1439, 1390, 1258, 1226, 1154, 1132, 1082, 1043, 977, 914, 815, 795, 769, 749, 719, 691, 638, 596, 565, 544  $\text{cm}^{-1}$ . HRMS (ESI): Exact mass calculated for  $\text{C}_{16}\text{H}_{13}\text{O}_3\text{PNa}$   $[\text{M}+\text{Na}]^+$  307.0500, found 307.0506.

#### 4. Details for Optimization of the Reaction Conditions.

**Table S1.** Survey of catalysts for the hydrolysis of diphenylphosphinic amide **1n**<sup>a</sup>

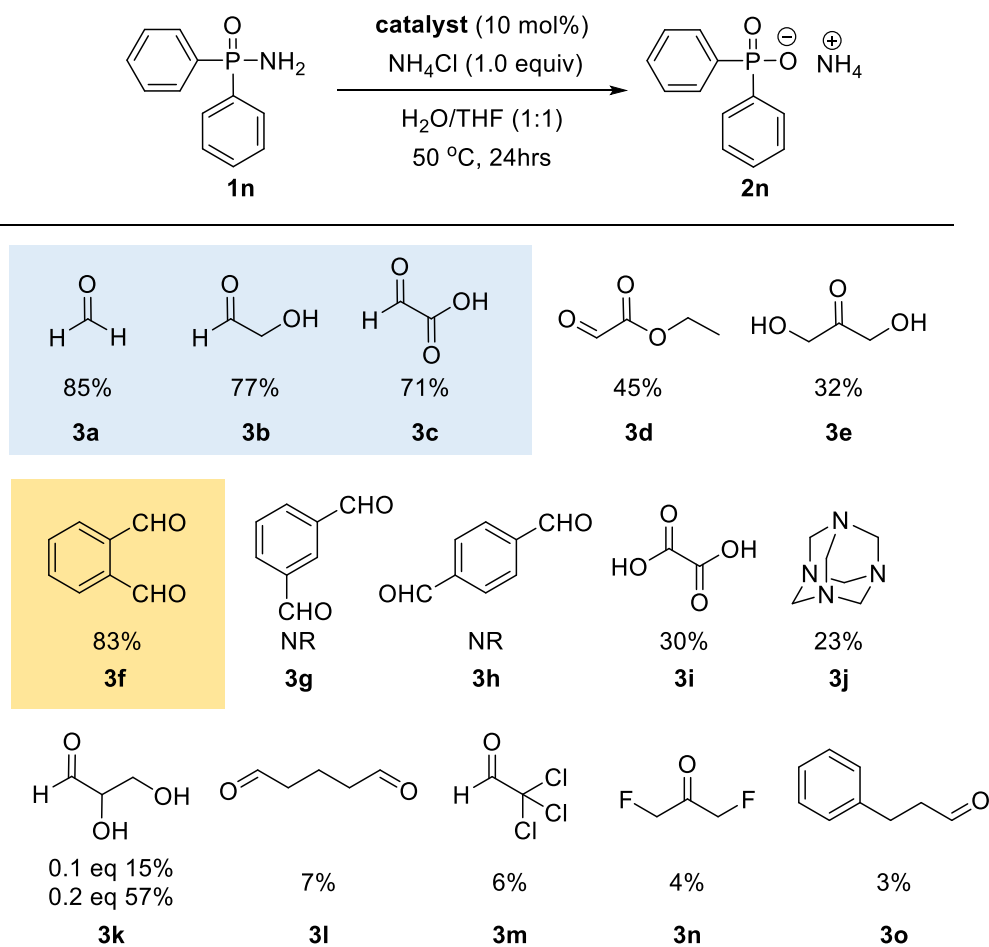

<sup>a</sup> Reaction conditions: **1n** (0.2 mmol), NH<sub>4</sub>Cl (0.2 mmol) and **catalyst** (0.02 mmol) in 0.2 mL of THF and 0.2 mL of H<sub>2</sub>O at 50 °C for 24 h in a sealed tube. The yield was determined by <sup>1</sup>H NMR analysis using 1,3,5-trimethoxybenzene as an internal standard.

**Table S2.** Screening of additives of the hydrolysis of diphenylphosphinic amide **1n**<sup>a</sup>

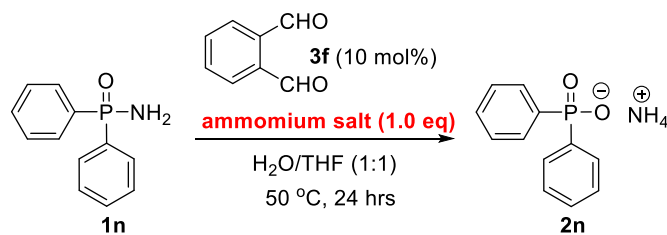

| Entry <sup>a</sup> | Ammonium salt                     | Yield (%) <sup>b</sup> |
|--------------------|-----------------------------------|------------------------|
| 1                  | NH <sub>4</sub> OTs               | 91                     |
| 2                  | NH <sub>4</sub> Cl                | 83                     |
| 3                  | NH <sub>4</sub> I                 | 74                     |
| 4                  | NH <sub>4</sub> OMs               | 70                     |
| 5                  | NH <sub>4</sub> O <sub>2</sub> CH | 23                     |
| 6                  | NH <sub>4</sub> OAc               | N.R.                   |
| 7                  | NH <sub>4</sub> OH                | N.R.                   |

<sup>a</sup> Reaction conditions: **1n** (0.2 mmol), ammonia salt (0.2 mmol) and **3f** (0.02 mmol) in 0.2 mL of solvent and 0.2 mL of H<sub>2</sub>O at 50 °C for 24 h in a sealed tube. <sup>b</sup> Determined by <sup>1</sup>H NMR analysis using 1,3,5-trimethoxybenzene as an internal standard.

**Table S3.** Study on the amount of NH<sub>4</sub>OTs<sup>a</sup>

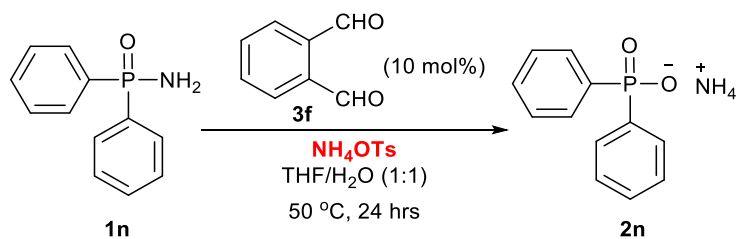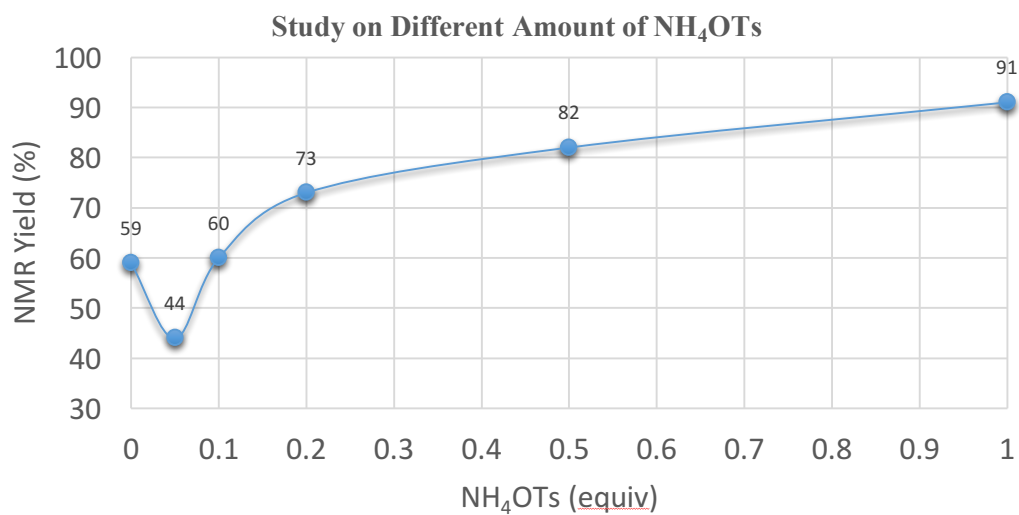

<sup>a</sup> Reaction conditions: **1n** (0.2 mmol), NH<sub>4</sub>OTs and **3f** (0.02 mmol) in 0.2 mL of THF and 0.2 mL of H<sub>2</sub>O at 50 °C for 24 h in a sealed tube. The yield was determined by <sup>1</sup>H NMR analysis using 1,3,5-trimethoxybenzene as an internal standard.

**Table S4.** Survey of catalysts for the hydrolysis of diphenylphosphinic amide **1a**<sup>a</sup>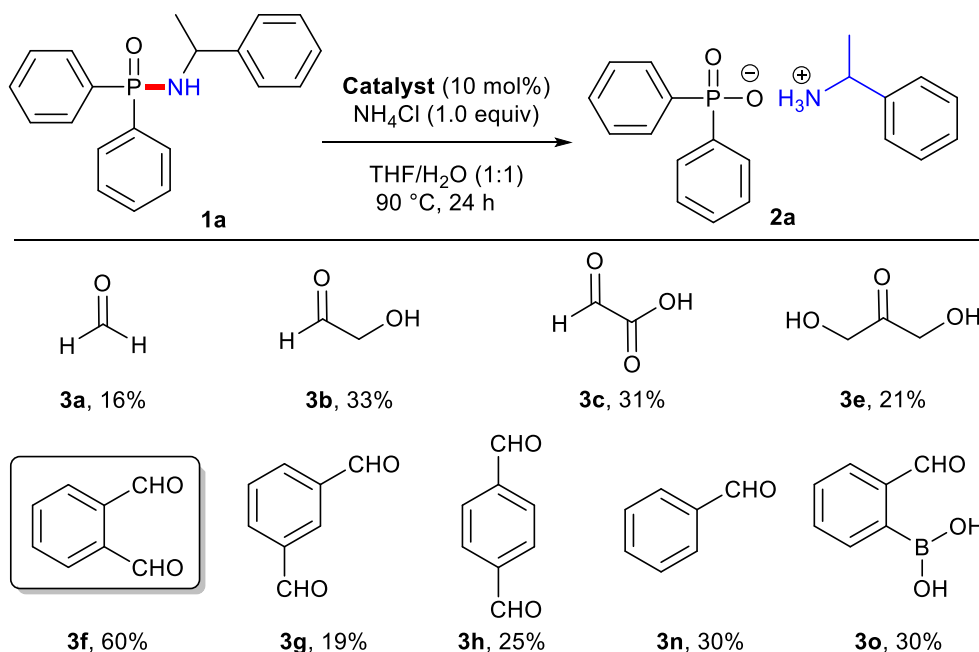

<sup>a</sup> Reaction conditions: **1a** (0.2 mmol), NH<sub>4</sub>Cl (0.2 mmol) and **3** (0.02 mmol) in 0.2 mL of THF and 0.2 mL of H<sub>2</sub>O at 90 °C for 24 h in a sealed tube. The yield was determined by <sup>1</sup>H NMR analysis using 1,3,5-trimethoxybenzene as an internal standard.

**Table S5** Screen of additives for the hydrolysis of diphenylphosphinic amide **1a**<sup>a</sup>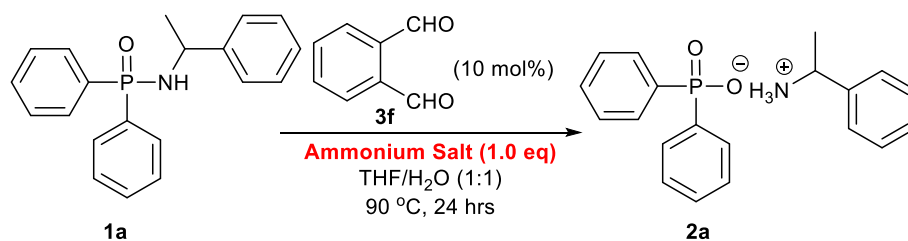

| Entry <sup>a</sup> | Ammonium salt                      | Solvent    | Yield (%) <sup>b</sup> |
|--------------------|------------------------------------|------------|------------------------|
| 1                  | NH <sub>4</sub> Cl                 | THF        | 60                     |
| 2                  | MeNH <sub>2</sub> •HCl             | THF        | 40                     |
| 3                  | Pyrrolidine•HCl                    | THF        | 42                     |
| 2                  | ( <i>n</i> -Bu) <sub>3</sub> N•HCl | THF        | 52                     |
| <b>3</b>           | <b>NH<sub>4</sub>OTs</b>           | <b>THF</b> | <b>75</b>              |
| 4                  | NH <sub>4</sub> OAc                | THF        | 10                     |
| 5                  | NH <sub>4</sub> COOH               | THF        | N.R.                   |
| 6                  | -                                  | THF        | 36                     |

<sup>a</sup>Reaction conditions: **1a** (0.2 mmol), ammonia salt (0.2 mmol) and **3f** (0.02 mmol) in 0.2 mL of solvent and 0.2 mL of H<sub>2</sub>O at 90 °C for 24 h in a sealed tube. <sup>b</sup>Determined by <sup>1</sup>H NMR analysis using 1,3,5-trimethoxybenzene as an internal standard.

**Table S6.** Solvent screen for the hydrolysis of diphenylphosphinic amide **1a**<sup>a</sup>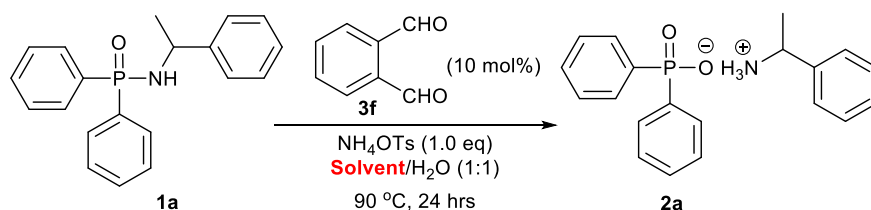

| Entry <sup>a</sup>   | Ammonium salt                             | Solvent     | Yield (%) <sup>b</sup>     |
|----------------------|-------------------------------------------|-------------|----------------------------|
| 1                    | $\text{NH}_4\text{OTs}$                   | THF         | 75                         |
| 2                    | $\text{NH}_4\text{OTs}$                   | DMF         | 38                         |
| 3                    | $\text{NH}_4\text{OTs}$                   | DMSO        | 59                         |
| 4                    | $\text{NH}_4\text{OTs}$                   | 1,4-Dioxane | 69                         |
| 5                    | $\text{NH}_4\text{OTs}$                   | MeCN        | 82                         |
| <b>6<sup>c</sup></b> | <b><math>\text{NH}_4\text{OTs}</math></b> | <b>MeCN</b> | <b>99 (91)<sup>d</sup></b> |
| 7 <sup>e</sup>       | $\text{NH}_4\text{OTs}$                   | MeCN        | 4                          |

<sup>a</sup> Reaction conditions: **1a** (0.2 mmol), ammonia salt (0.2 mmol) and **3f** (0.02 mmol) in 0.2 mL of solvent and 0.2 mL of  $\text{H}_2\text{O}$  at 90 °C for 24 h in a sealed tube. <sup>b</sup> Determined by  $^1\text{H}$  NMR analysis using 1,3,5-trimethoxybenzene as an internal standard. <sup>c</sup> **3f** (0.04 mmol) was used. <sup>d</sup> Isolated yield based on diphenylphosphinic acid. <sup>e</sup> Without *o*-phthalaldehyde.

## 5. General Procedure for the Hydrolysis Reaction

### 5.1 Isolation of diphenylphosphinic acid.

Diphenylphosphinic amide **1** (0.2 mmol), phthalaldehyde **3f** (0.04mmol) and  $\text{NH}_4\text{OTs}$  (0.2 mmol) were added into a sealed tube. 0.2 mL MeCN and 0.2 mL  $\text{H}_2\text{O}$  were followed. Then the reaction mixture was stirred under 90 °C for 24 hours. Then the solvent was removed by high vacuum and following adding  $\text{H}_2\text{O}$  (10 mL) and toluene (10 mL). The mixture was stirred for 10 minutes and the aqueous layer was collected. After acidification of the aqueous layer by 1 M HCl to pH = 1~2, then the aqueous layer was extracted using 5% methanol in dichloromethane (20 mL x 3). The organic layers was combined, dried over  $\text{Na}_2\text{SO}_4$  and filtered and concentrated *in vacuo*.

### 5.2 Isolation of amine component.

Diphenylphosphinic amide **1** (0.2 mmol), phthalaldehyde **3f** (0.04mmol) and  $\text{NH}_4\text{OTs}$  (0.2 mmol) were added into a sealed tube. 0.2 mL MeCN and 0.2 mL  $\text{H}_2\text{O}$  were followed. Then the reaction mixture was stirred under 90 °C for 24 hours. Then the solvent was removed by high vacuum and following adding  $\text{H}_2\text{O}$  (10 mL) and toluene (10 mL). The mixture was stirred for 10 minutes and the aqueous layer was collected. After basification of the aqueous layer by 1 M NaOH to pH = 8~9, then the aqueous layer was extracted using ethyl acetate (20 mL x 3). The organic layers was combined, dried over  $\text{Na}_2\text{SO}_4$  and filtered and concentrated *in vacuo*.

**Table S7.** Substrate scope for the catalytic hydrolysis of P(=O)-NHR reagents showing the results in the absence of *o*-phthalaldehyde<sup>a</sup>

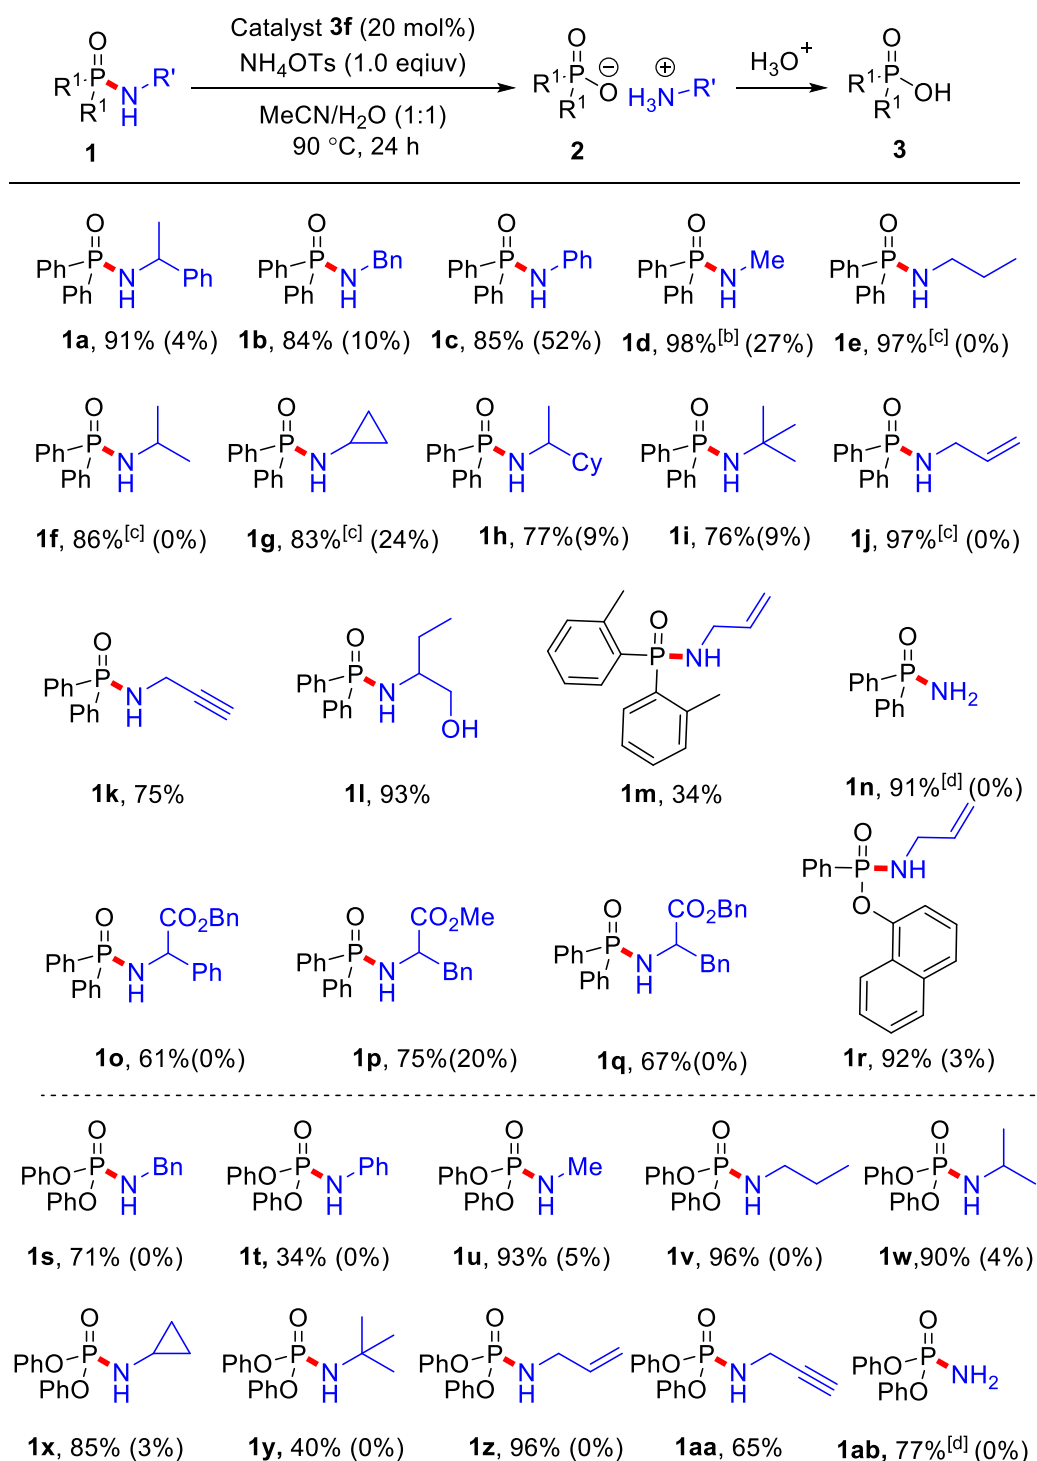

<sup>a</sup> Reaction conditions: **1** (0.2 mmol), NH<sub>4</sub>OTs (0.2 mmol) and **3f** (0.04 mmol) in 0.2 mL of solvent and 0.2 mL of H<sub>2</sub>O at 90 °C for 24 h in a sealed tube. Results between parentheses related to similar reactions performed without adding **3f**. Amine component of hydrolysis reaction of **1a** was isolated in 87% yield.

<sup>b</sup> NH<sub>4</sub>OTs (0.04 mmol) was used at r.t. <sup>c</sup> NH<sub>4</sub>OTs (0.04 mmol) and **3f** (0.04 mmol) were used at 50 °C. <sup>d</sup> Performed in THF (0.2 mL) and H<sub>2</sub>O (0.2 mL) at 50 °C.

## 6. Comparison between phthalaldehyde and formaldehyde<sup>a</sup>

**Table S8.** Comparison between phthalaldehyde and formaldehyde<sup>a</sup>

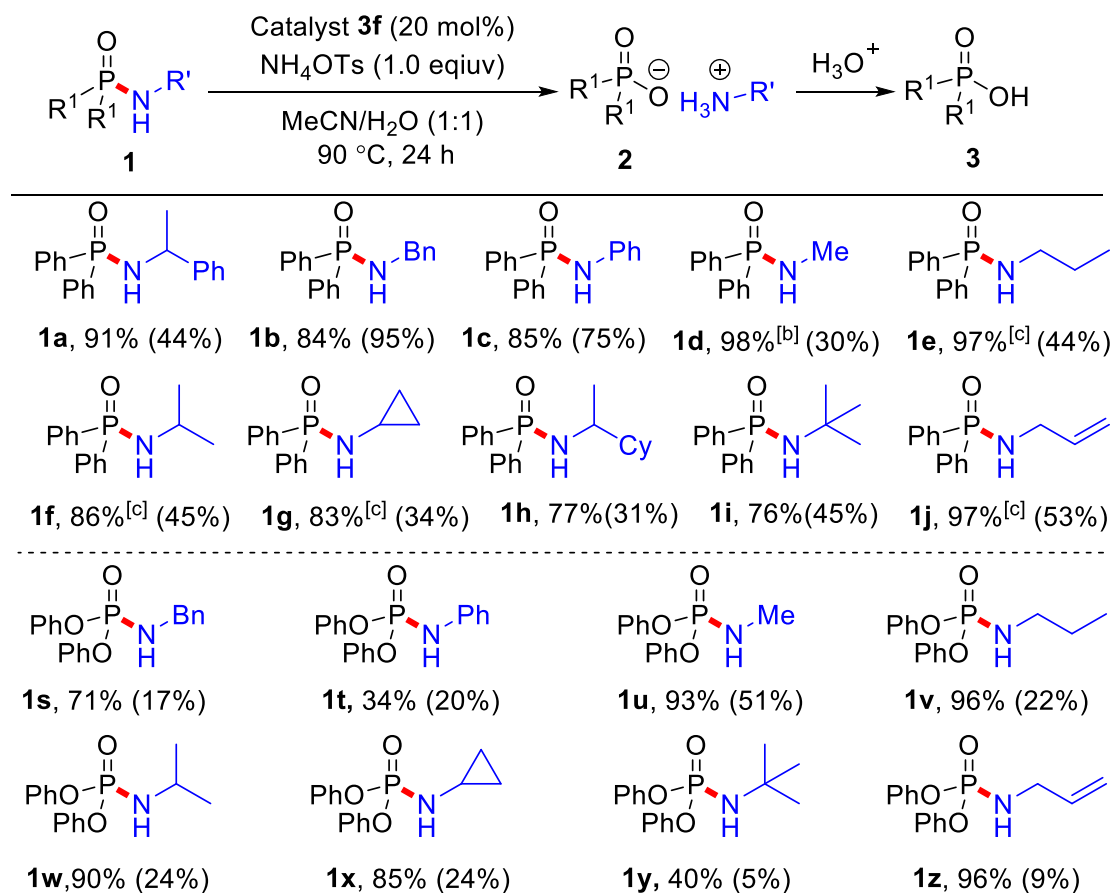

<sup>a</sup> Reaction conditions: **1a** (0.2 mmol), NH<sub>4</sub>OTs (0.2 mmol) and **3f** (0.04 mmol) in 0.2 mL of solvent and 0.2 mL of H<sub>2</sub>O at 90 °C for 24 h in a sealed tube. Results between parentheses related to similar reactions performed using 20 mol% of formaldehyde. <sup>b</sup> NH<sub>4</sub>OTs (0.04 mmol) was used at r.t. <sup>c</sup> NH<sub>4</sub>OTs (0.04 mmol) and **3f** (0.04 mmol) were used at 50 °C.



**Table S9.** Control experiments

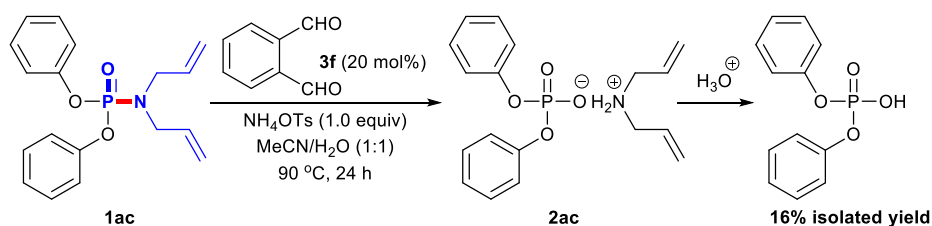

**Table S10.** Monitor the reaction time.

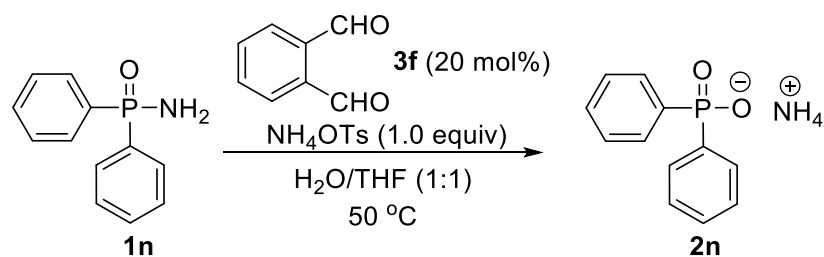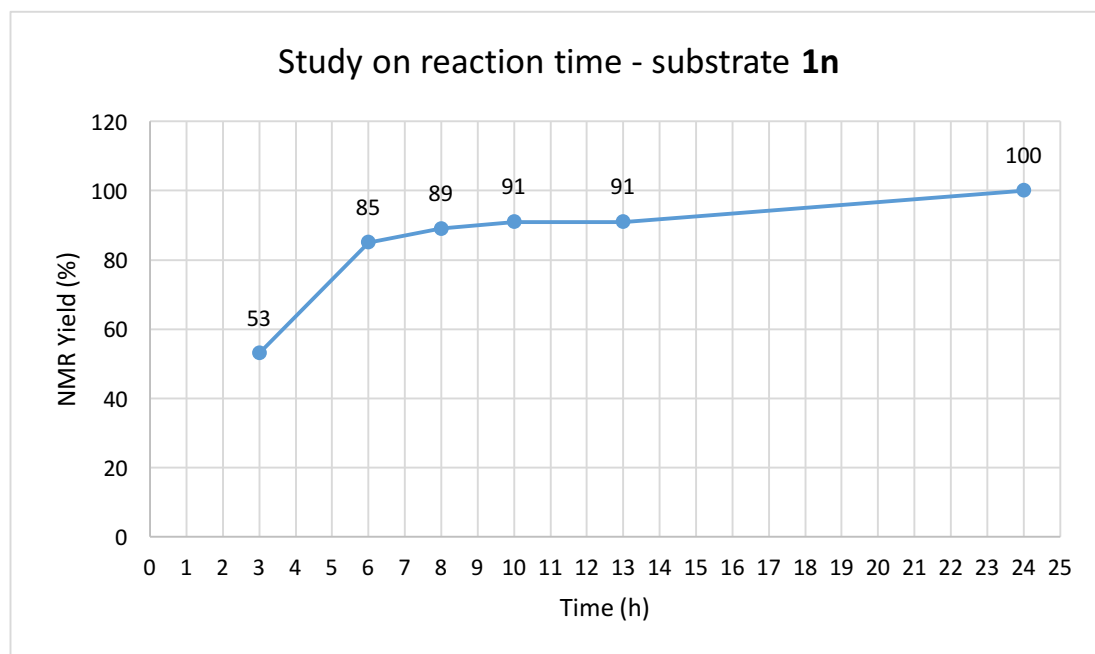

Reaction conditions: **1n** (0.2 mmol),  $\text{NH}_4\text{OTs}$  (0.2 mmol) and **3f** (0.04 mmol) in 0.2 mL of THF and 0.2 mL of H<sub>2</sub>O at 50 °C for 24 h in a sealed tube. The reaction was monitored by <sup>1</sup>H NMR analysis using 1,3,5-trimethoxybenzene as an internal standard.

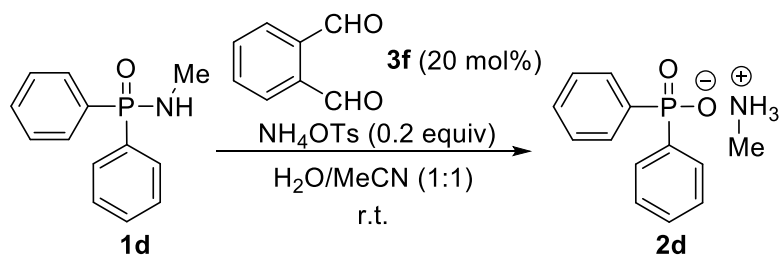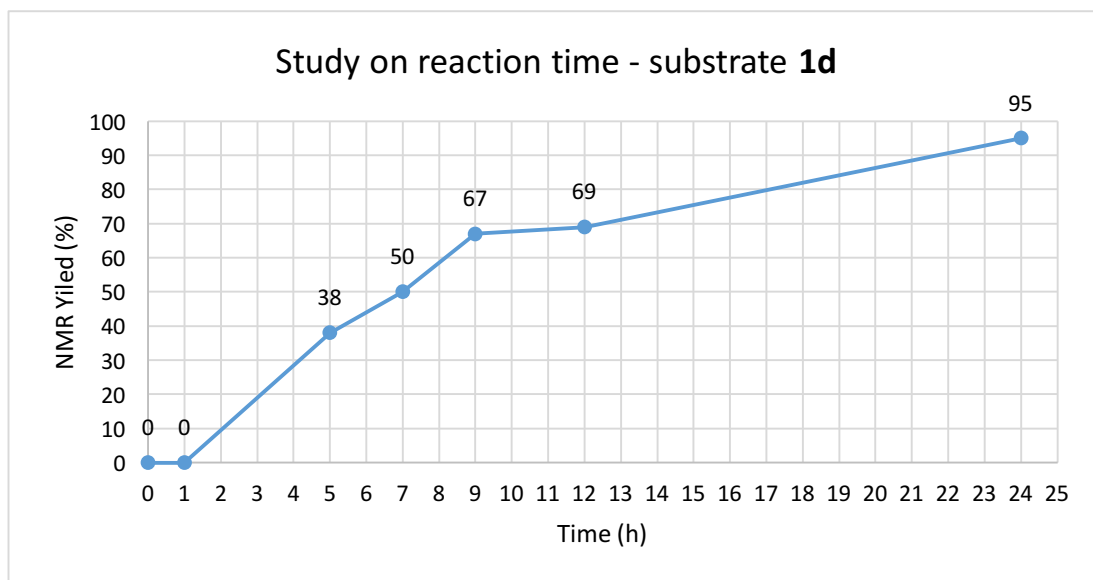

Reaction conditions: **1d** (0.2 mmol),  $\text{NH}_4\text{OTs}$  (0.04 mmol) and **3f** (0.04 mmol) in 0.2 mL of MeCN and 0.2 mL of  $\text{H}_2\text{O}$  at r.t. for 24 h in a sealed tube. The yield was determined by  $^1\text{H}$  NMR analysis using 1,3,5-trimethoxybenzene as an internal standard.

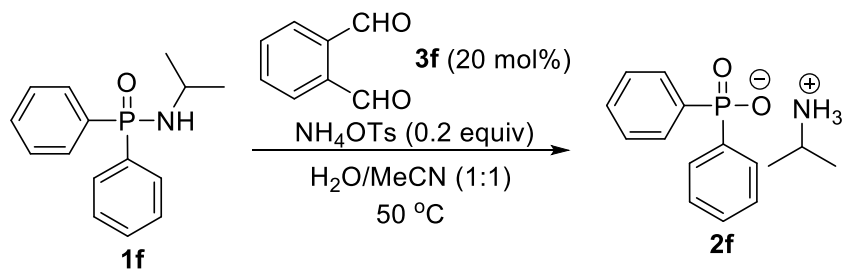

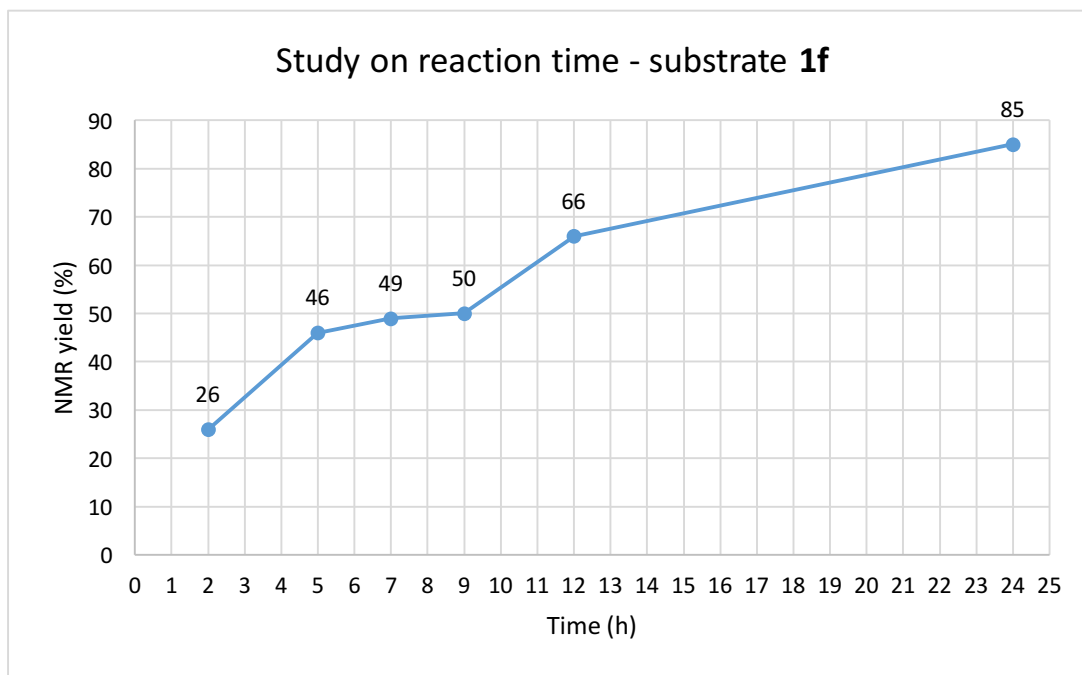

Reaction conditions: **1f** (0.2 mmol), NH<sub>4</sub>OTs (0.04 mmol) and **3f** (0.04 mmol) in 0.2 mL of MeCN and 0.2 mL of H<sub>2</sub>O at 50 °C for 24 h in a sealed tube. The yield was determined by <sup>1</sup>H NMR analysis using 1,3,5-trimethoxybenzene as an internal standard.

**Table S11.** Study the reaction at room temperature<sup>a</sup>

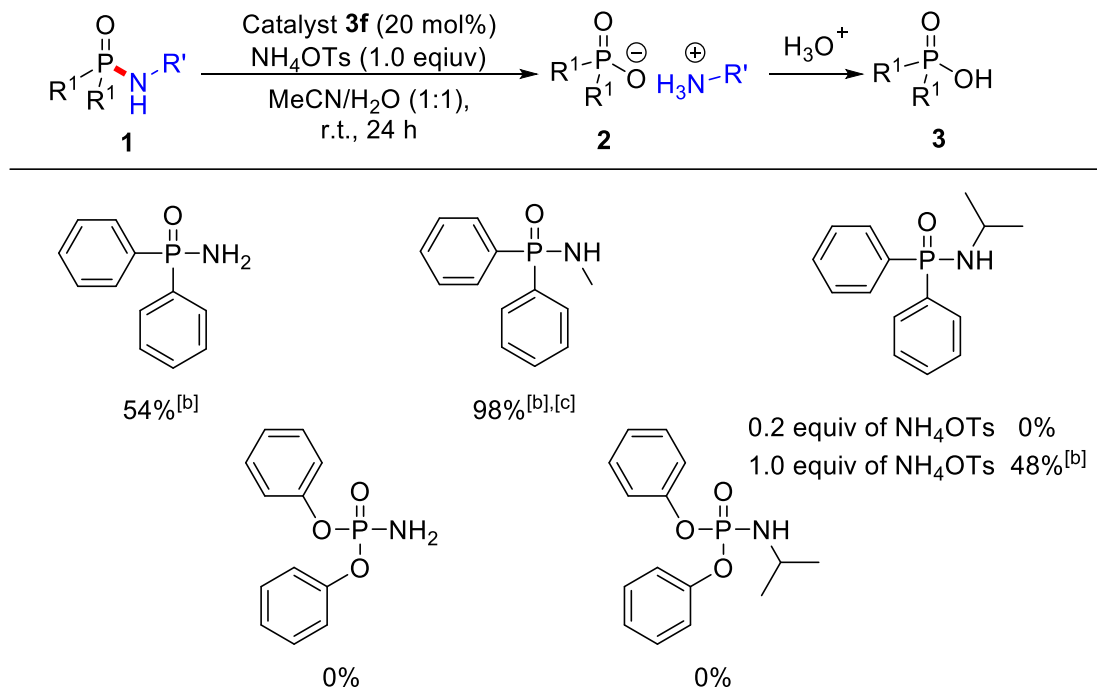

<sup>a</sup> Reaction conditions: **1** (0.2 mmol), NH<sub>4</sub>OTs (0.2 mmol) and **3f** (0.04 mmol) in 0.2 mL of MeCN and 0.2 mL of H<sub>2</sub>O at room temperature for 24 h in a sealed tube. <sup>b</sup> Isolated yield based on diphenylphosphinic acid. <sup>c</sup> NH<sub>4</sub>OTs (0.04 mmol) was used.

## 7. NMR spectra

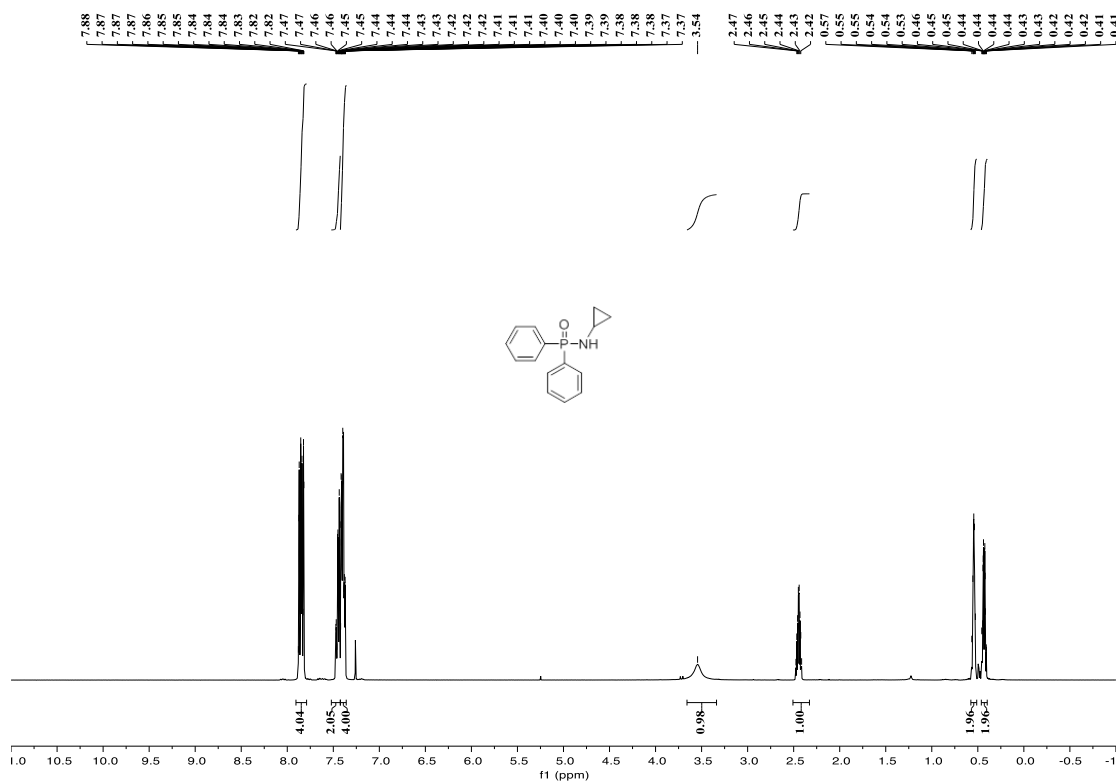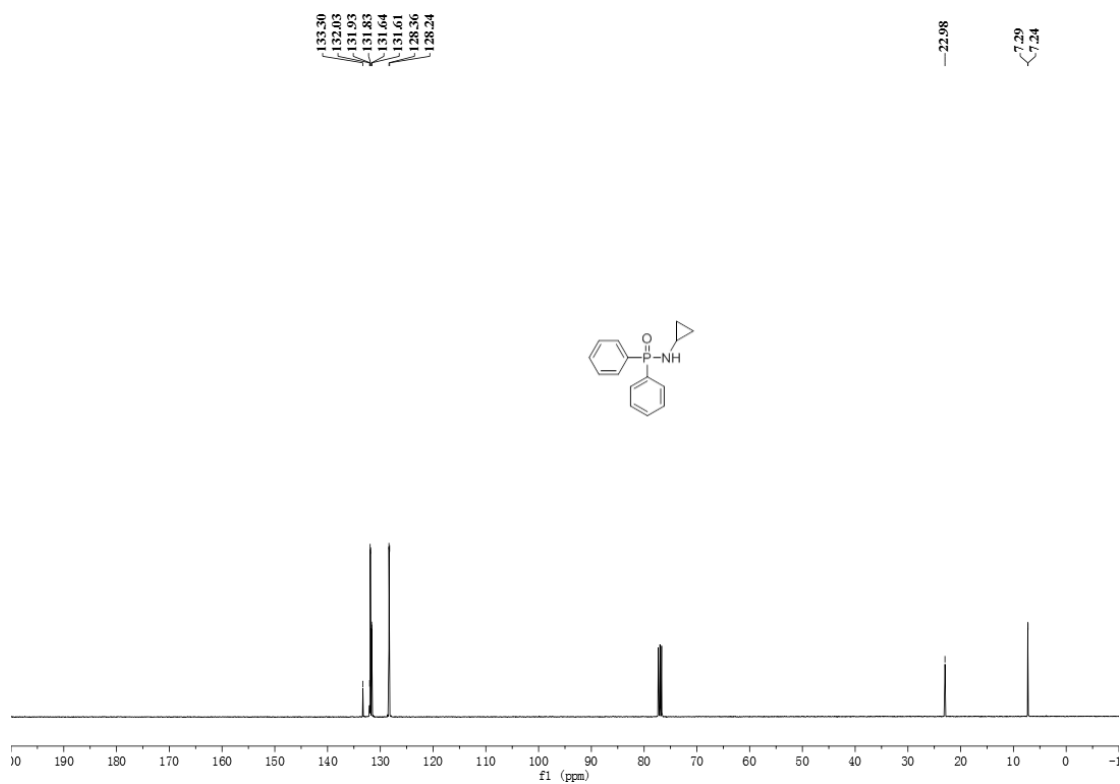

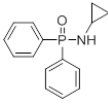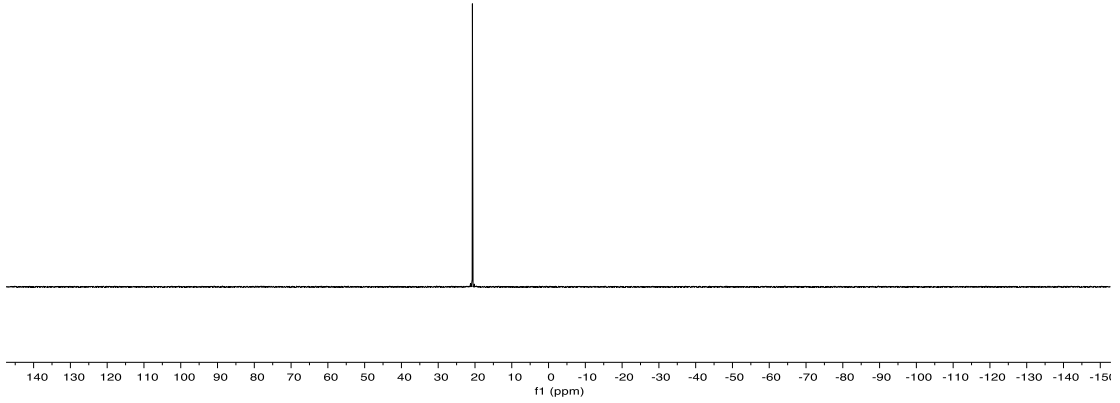

7.94  
7.93  
7.93  
7.93  
7.93  
7.92  
7.91  
7.91  
7.90  
7.90  
7.90  
7.89  
7.89  
7.88  
7.87  
7.87  
7.86  
7.86  
7.85  
7.84  
7.50  
7.50  
7.49  
7.49  
7.48  
7.48  
7.47  
7.47  
7.47  
7.47  
7.46  
7.46  
7.45  
7.45  
7.44  
7.44  
7.44  
7.43  
7.43  
7.43  
7.42  
7.42  
7.42  
7.41  
7.41  
7.40  
7.40  
2.92  
2.92  
2.92  
2.91  
2.91  
2.89  
2.88  
2.86  
1.61  
1.59  
1.59  
1.57  
1.56  
1.54  
-0.92  
-0.91  
-0.87

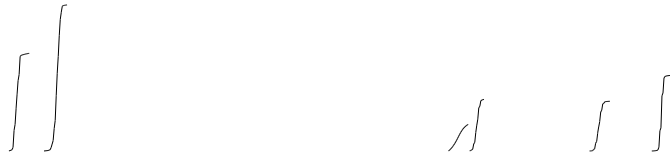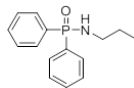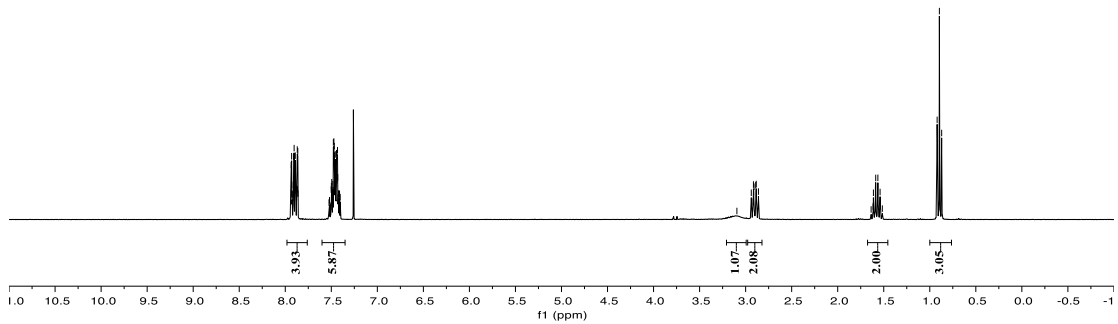

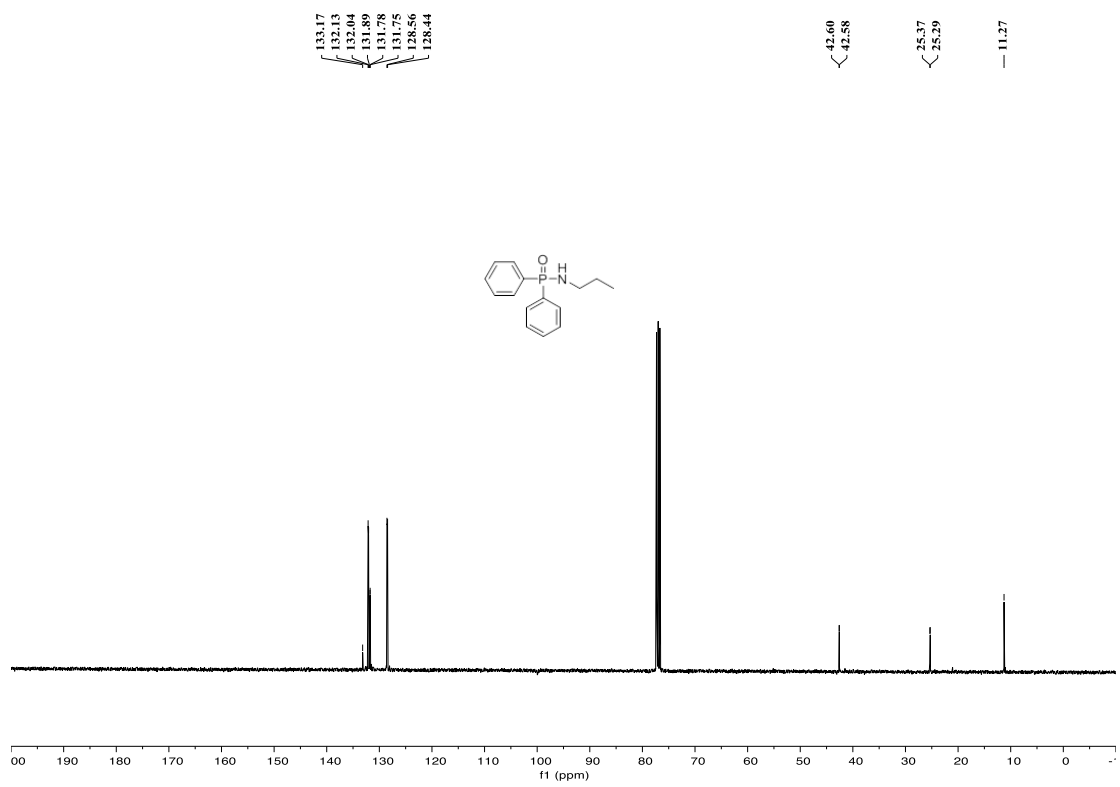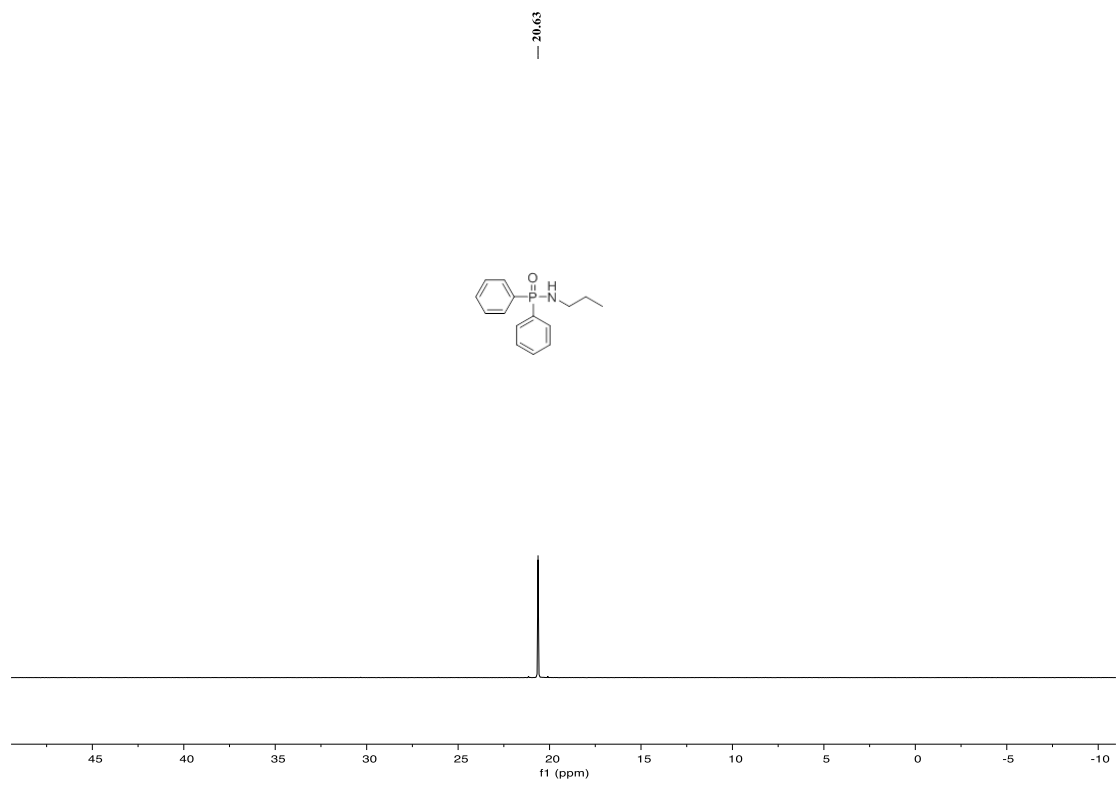

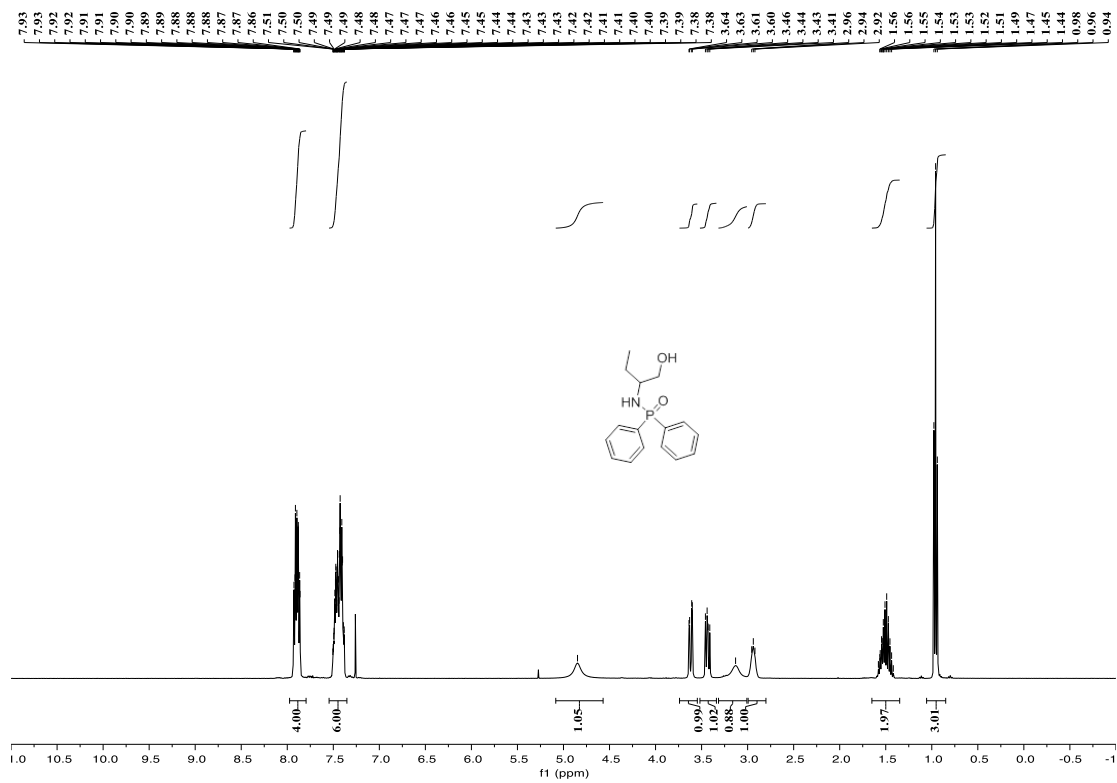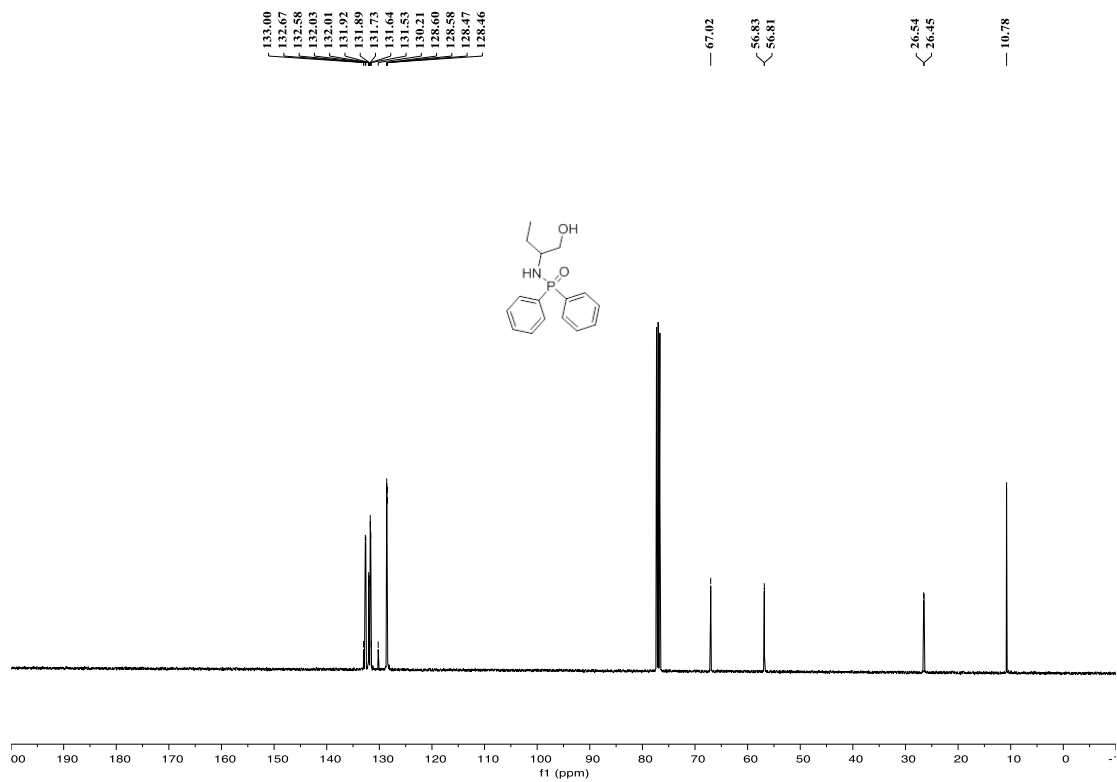

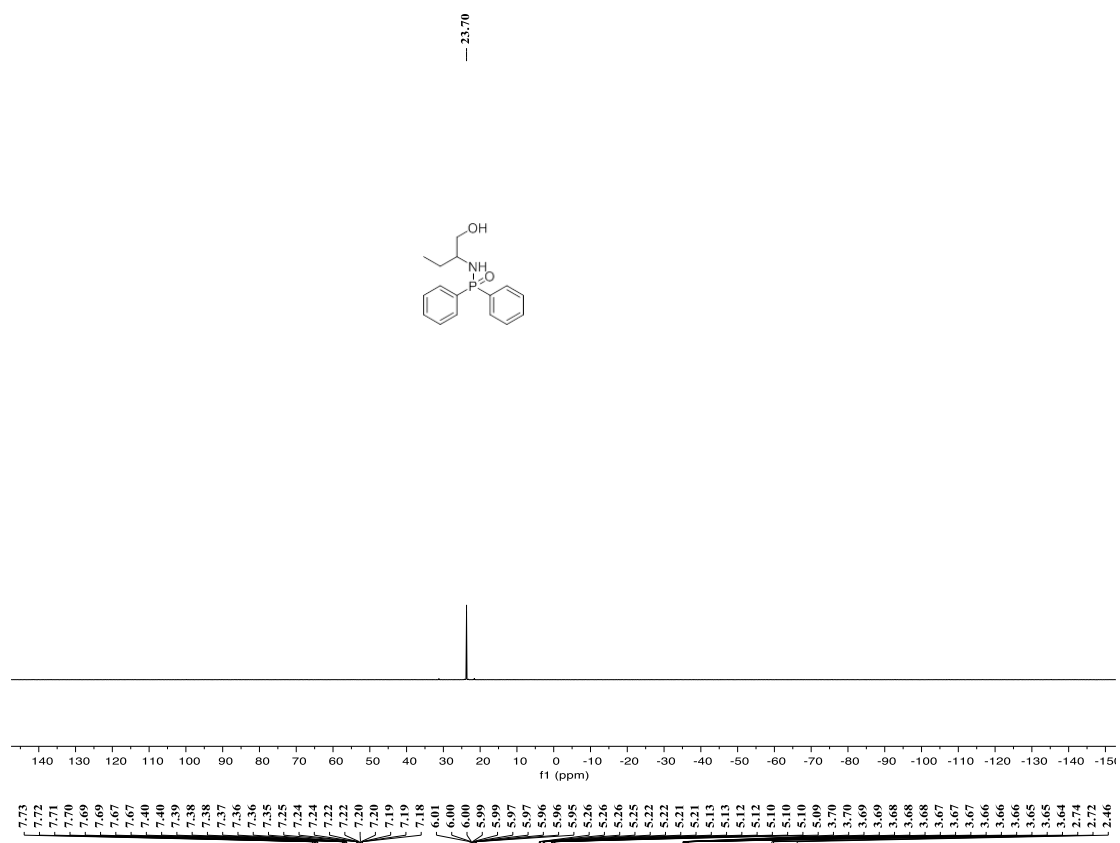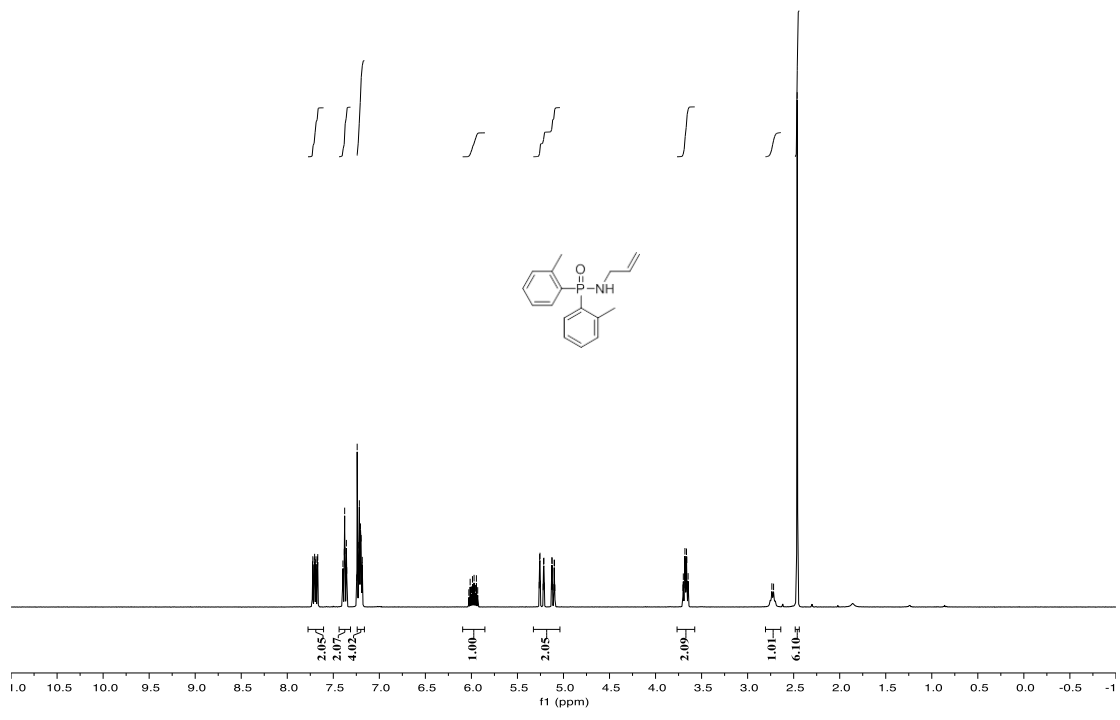



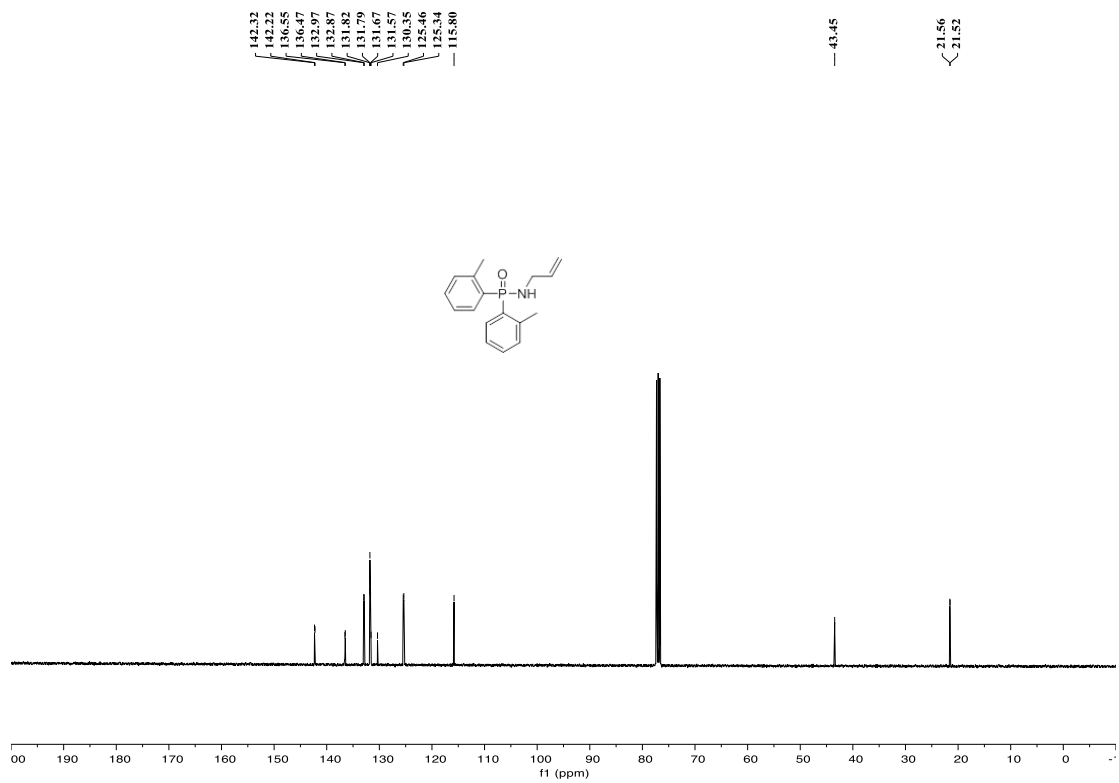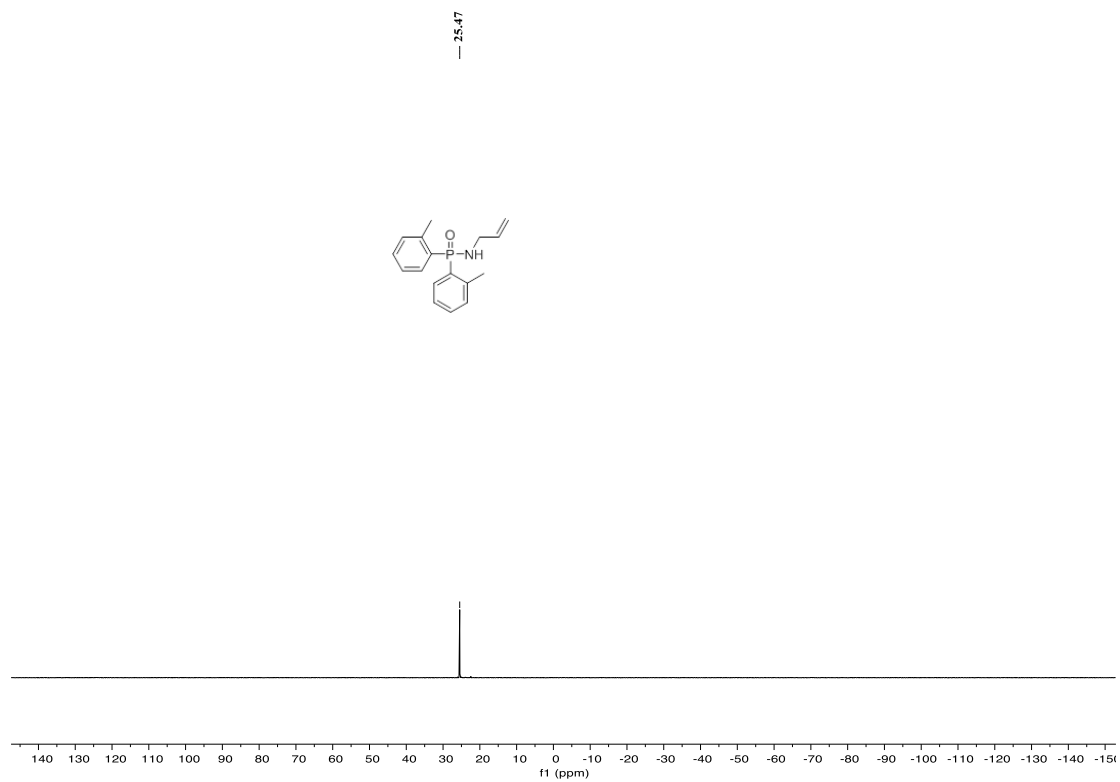

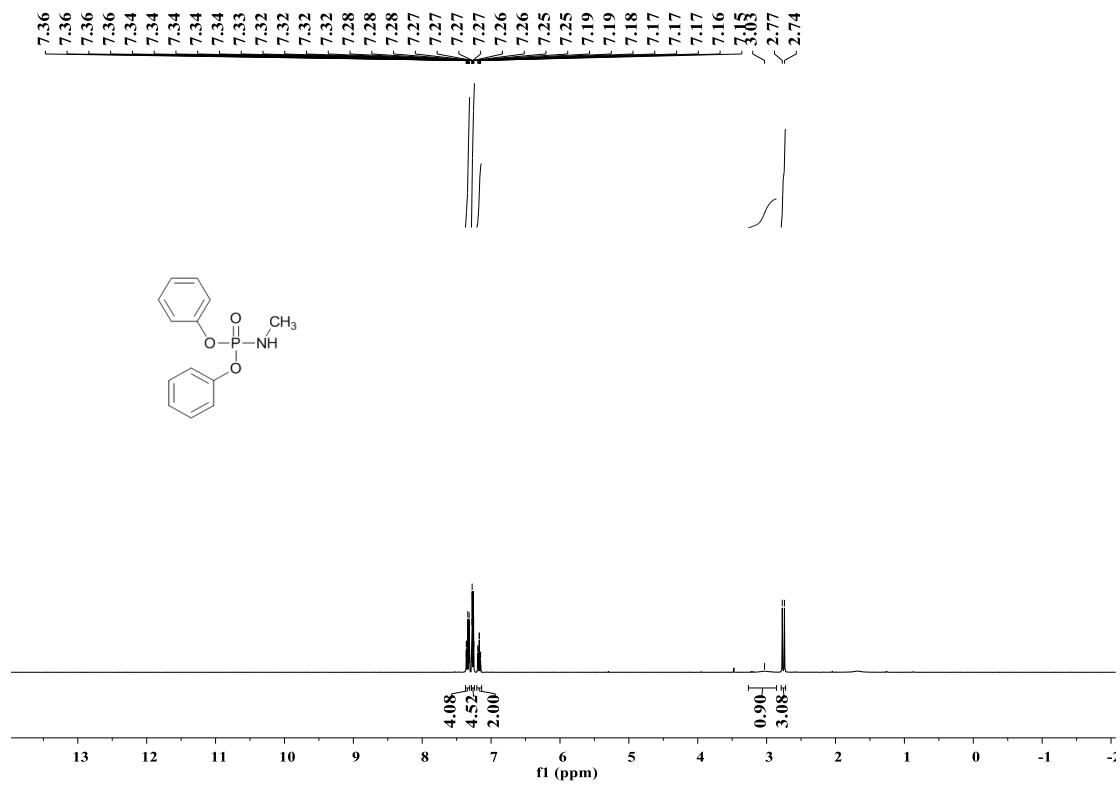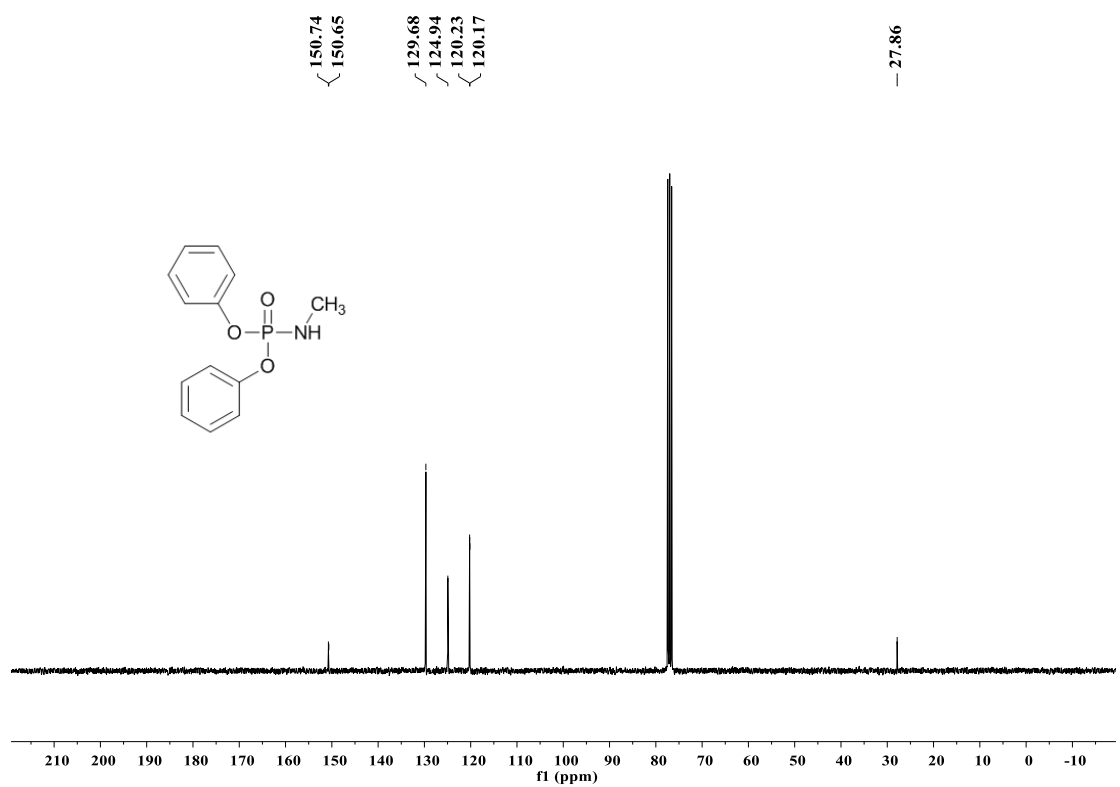

- 0.42

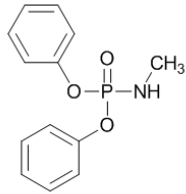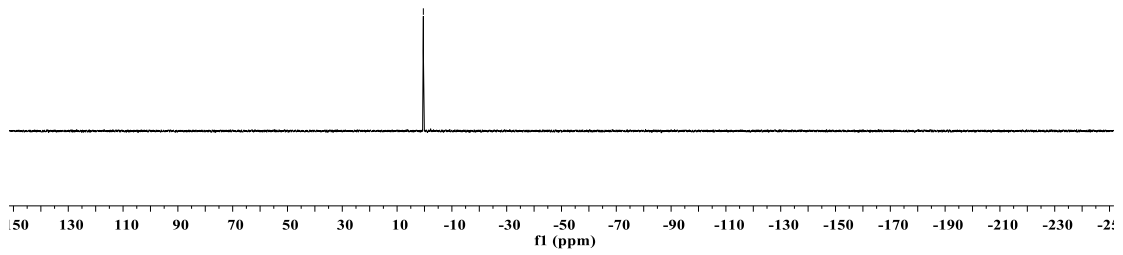

7.33  
7.29  
7.28  
7.24  
7.23  
7.16  
7.15  
7.13

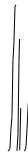

3.07  
3.06  
3.04  
3.03  
3.02  
3.01  
3.00  
2.96

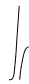

1.53  
1.51  
1.49  
1.47  
1.44  
0.88  
0.86  
0.84

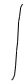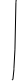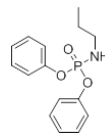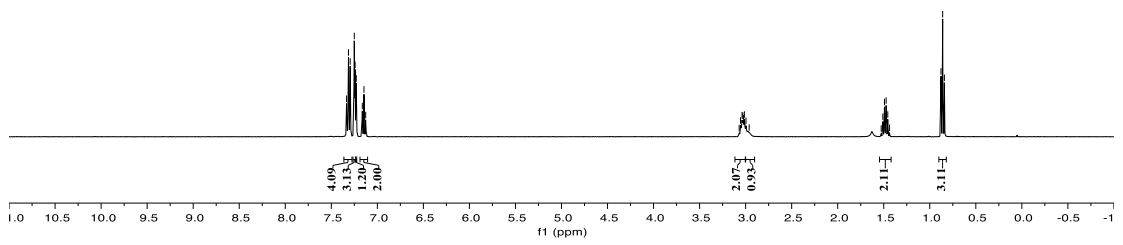

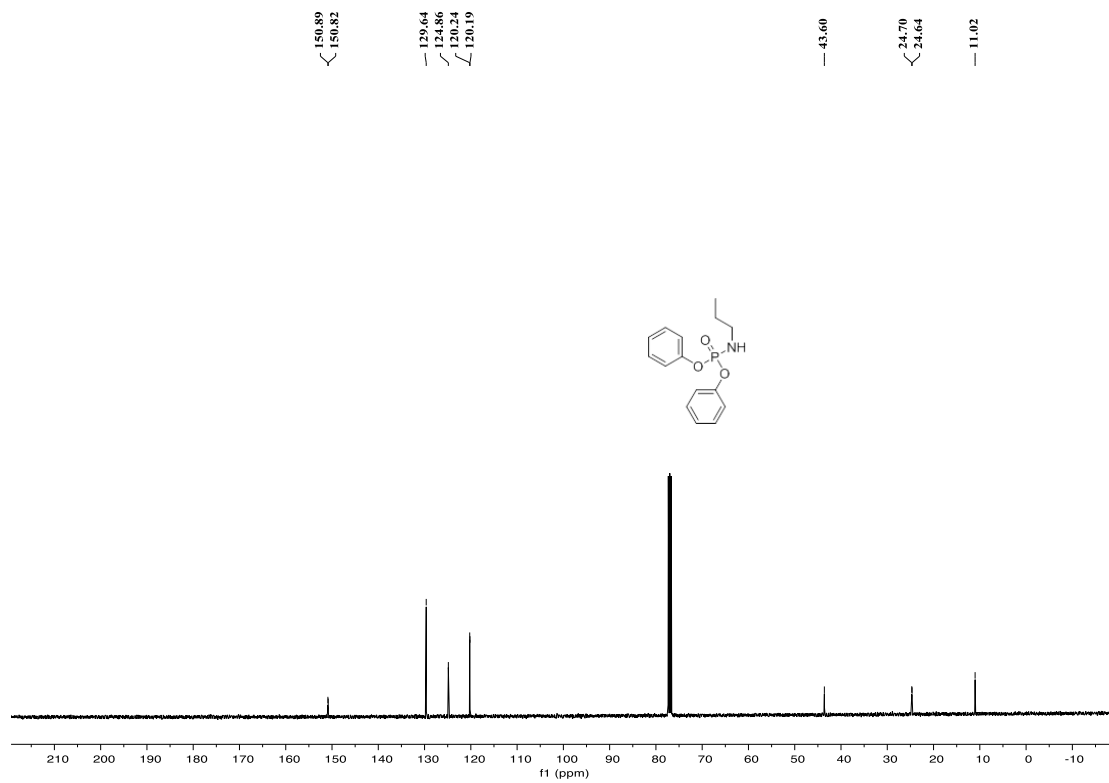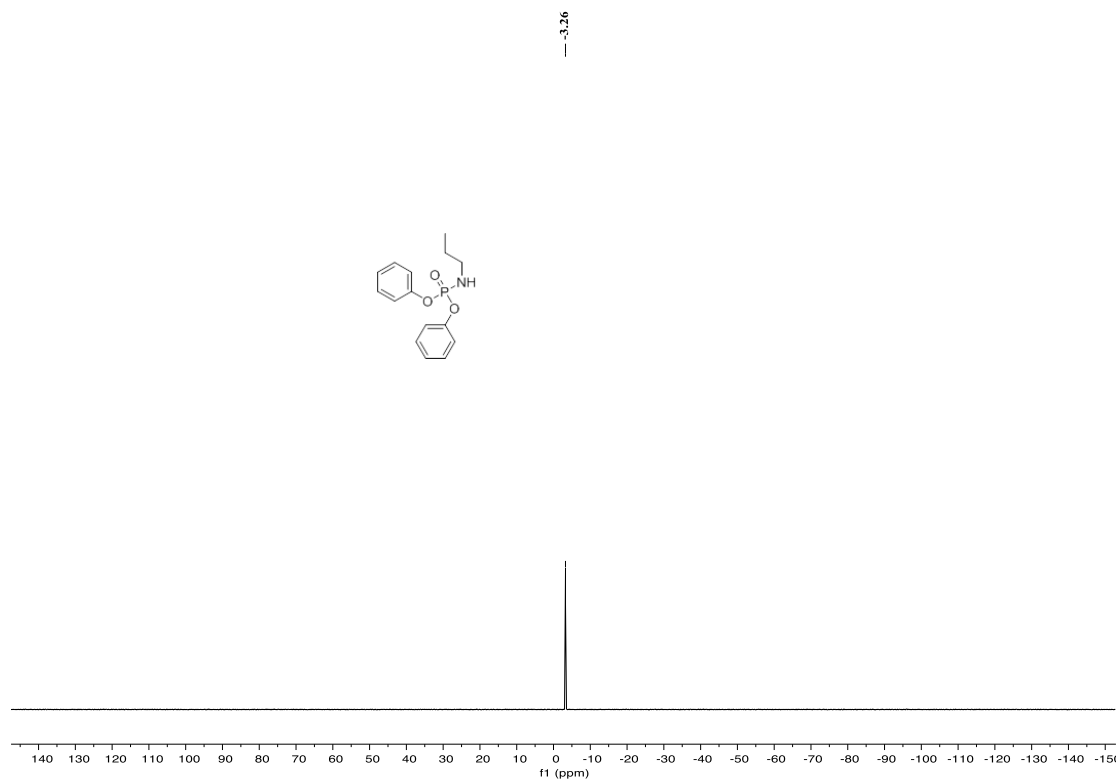

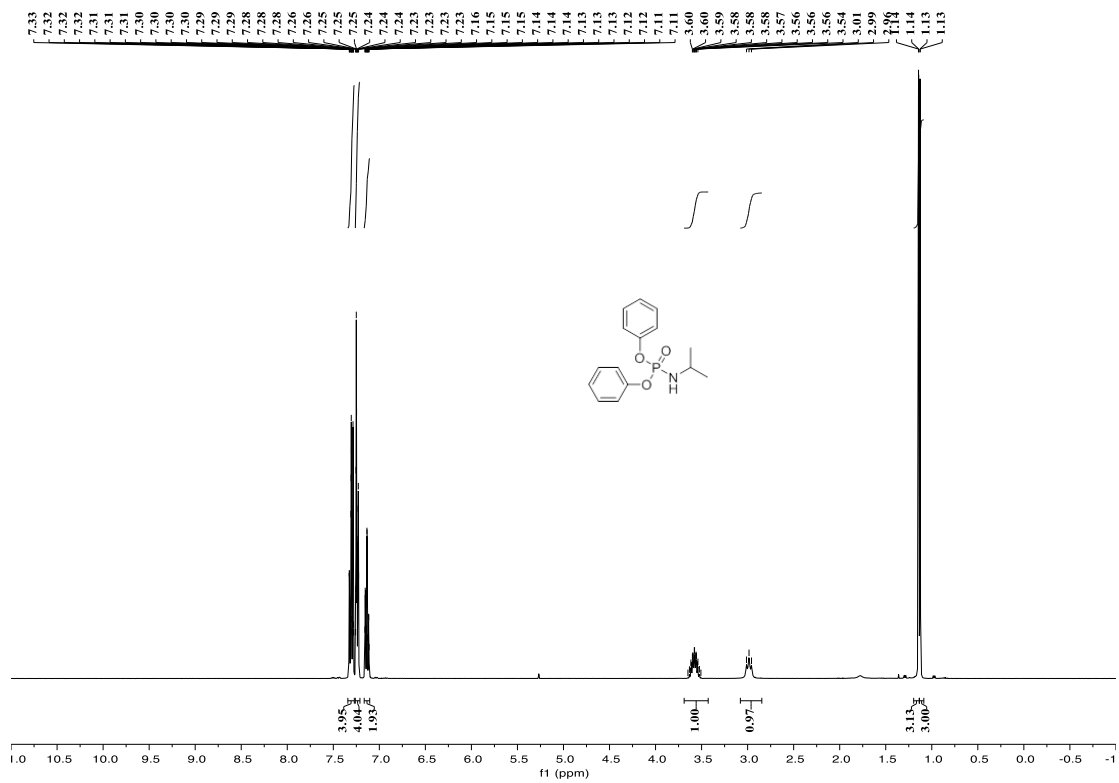

150.97  
150.91

129.59  
124.75  
124.74  
120.19  
120.14

44.52

25.11  
25.05

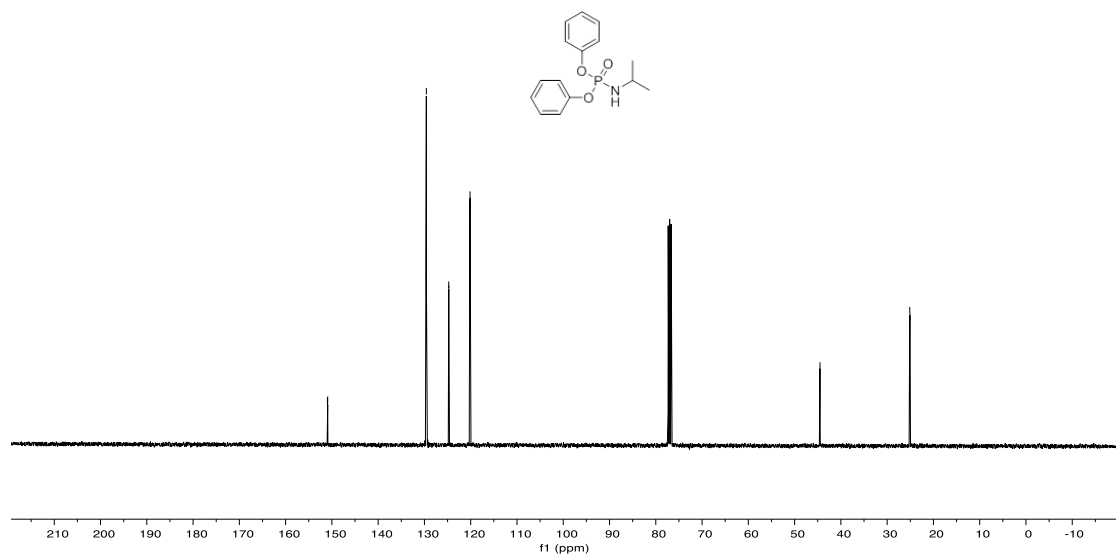

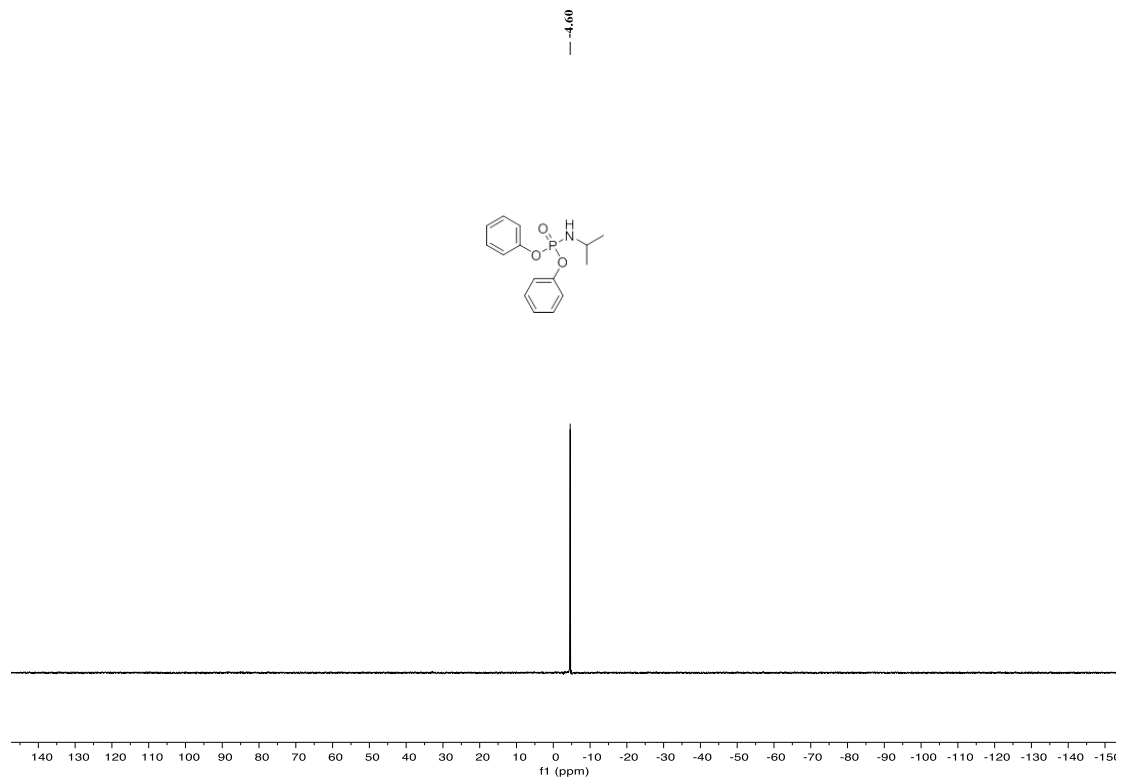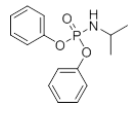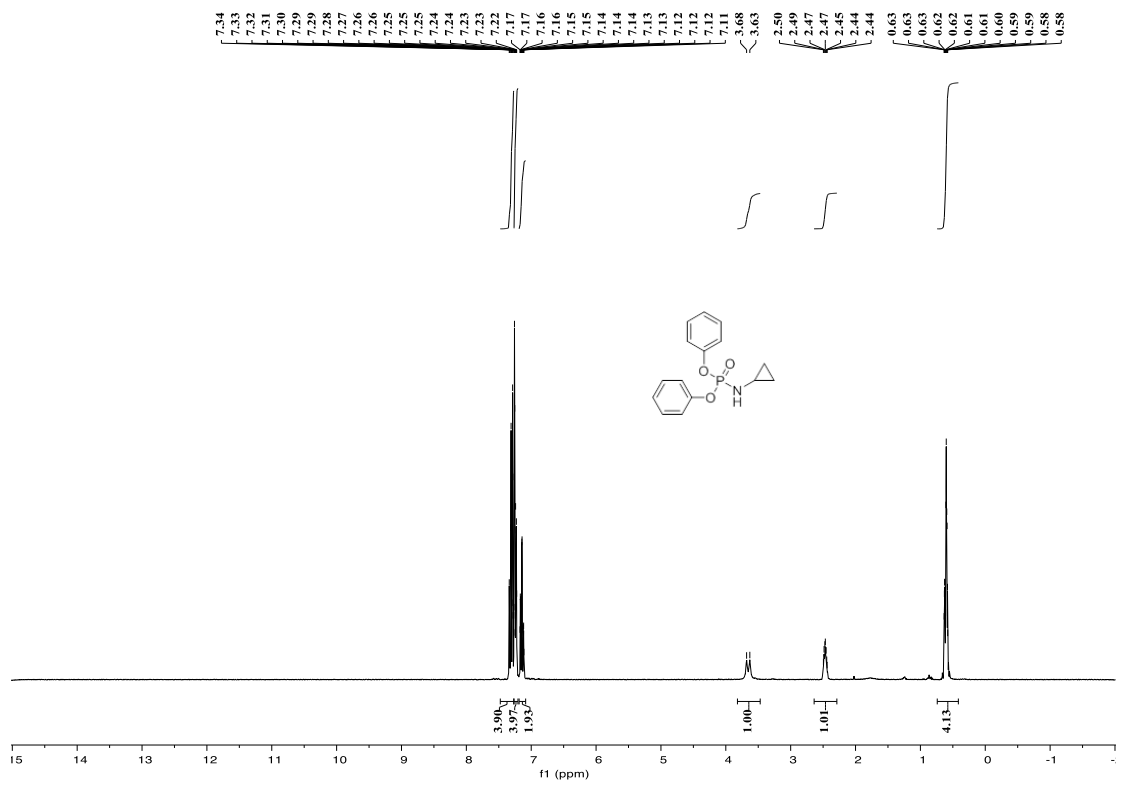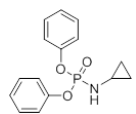

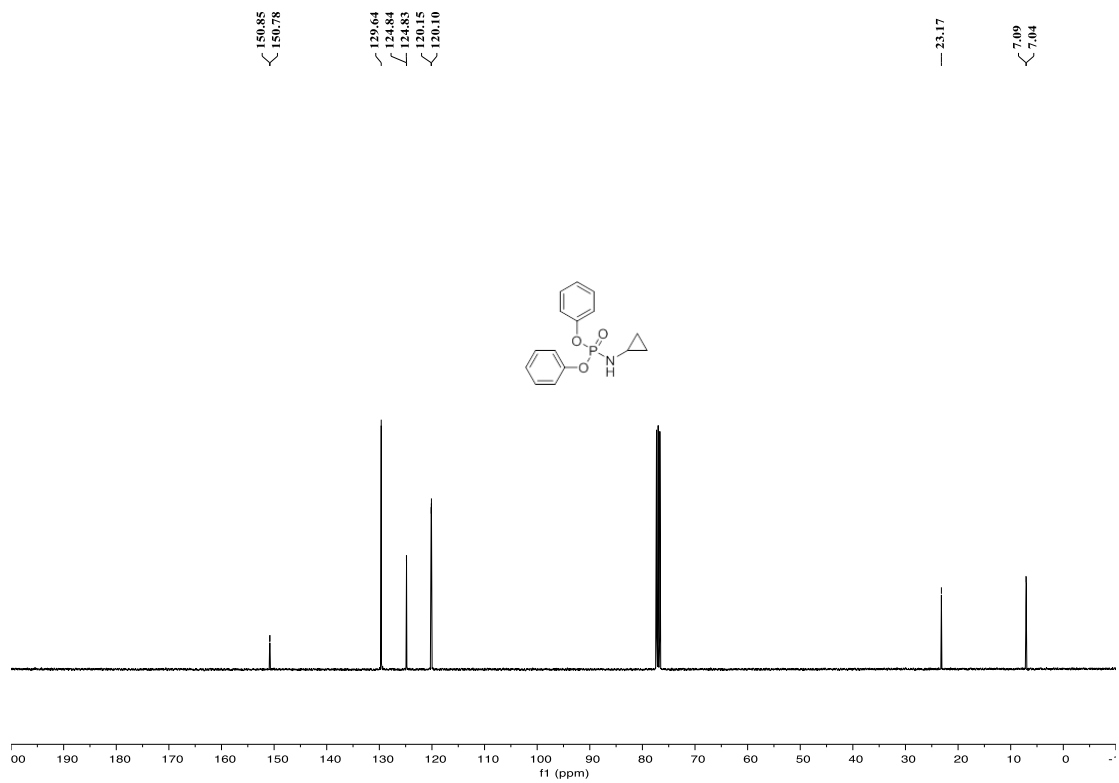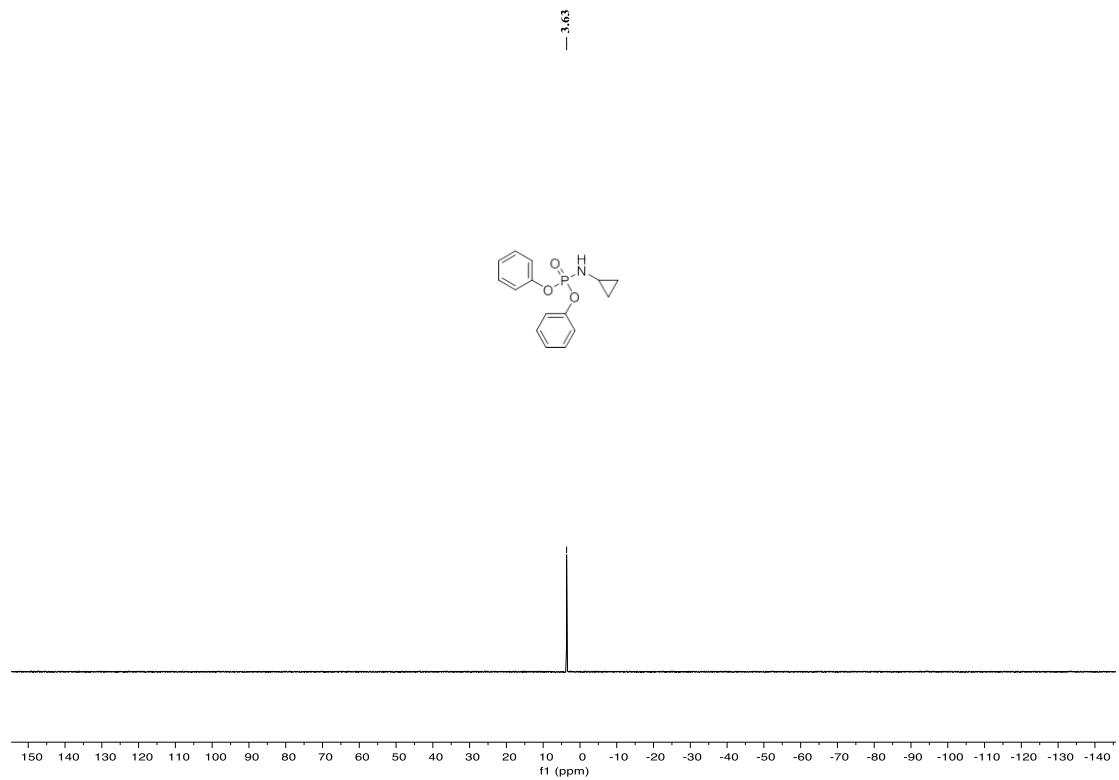

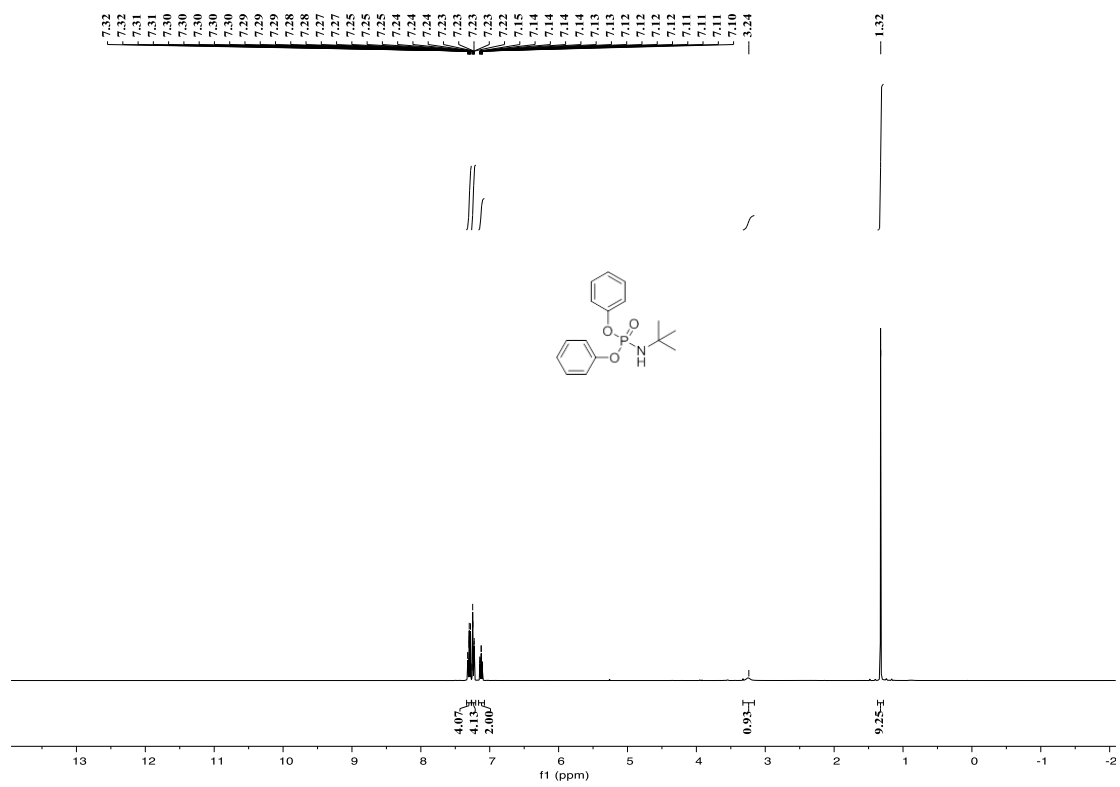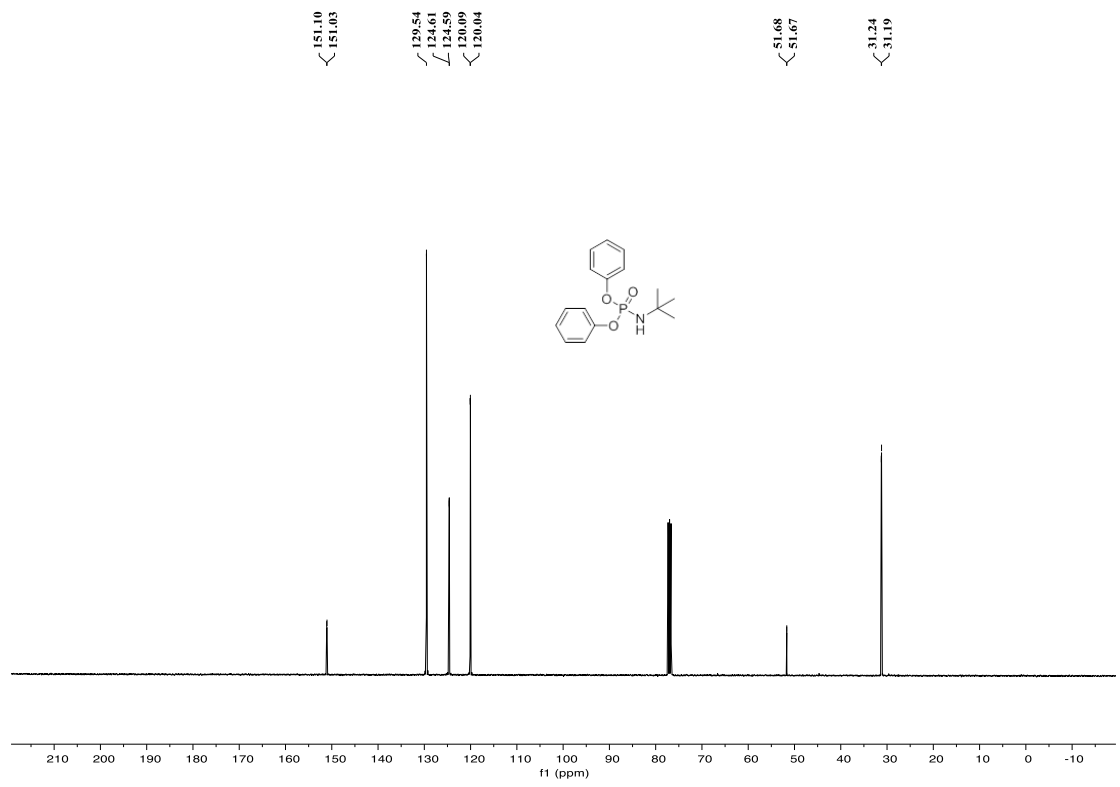



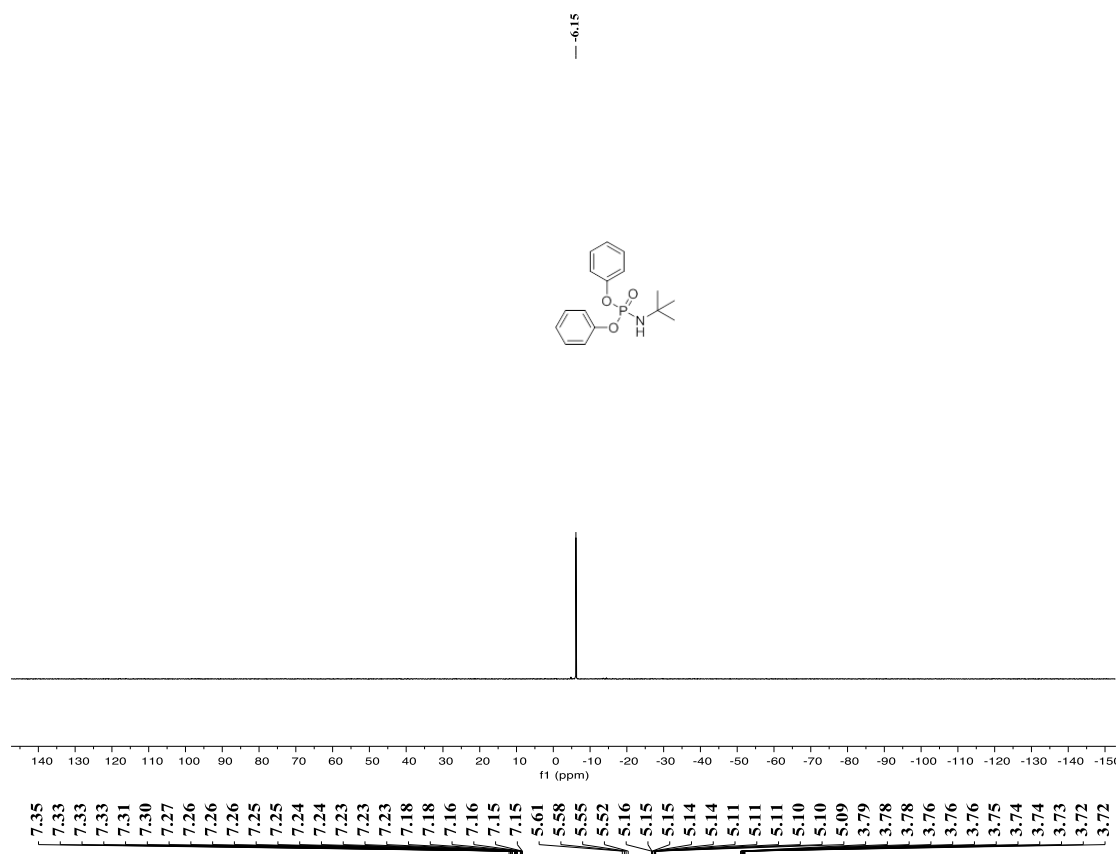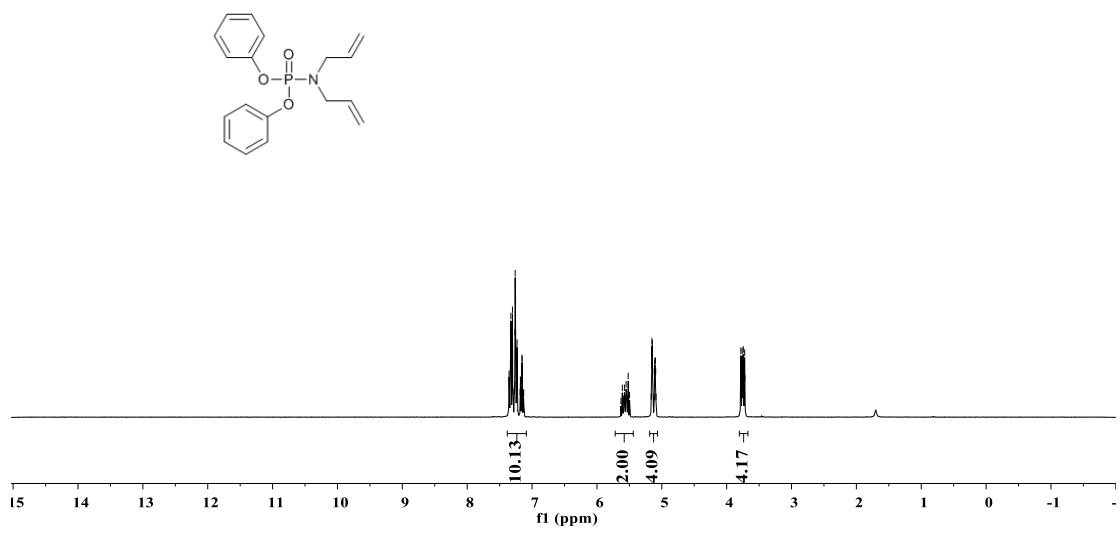

151.22  
151.15  
133.95  
133.93  
129.92  
125.13  
125.12  
120.54  
120.49  
118.78

48.14  
48.09

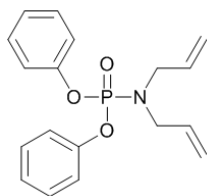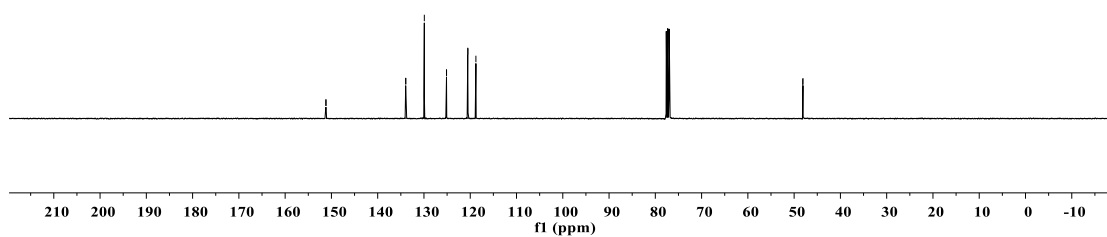

-2.77

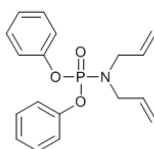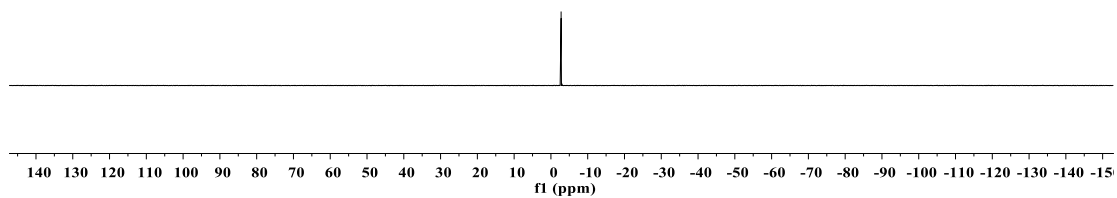

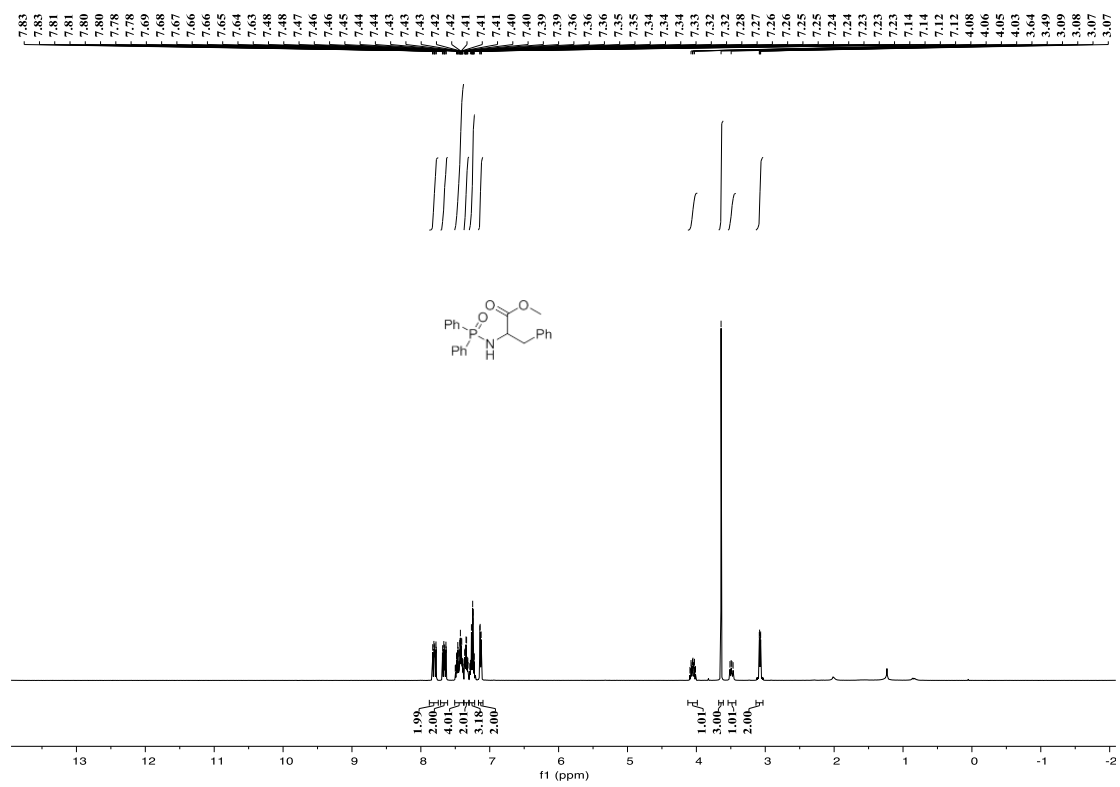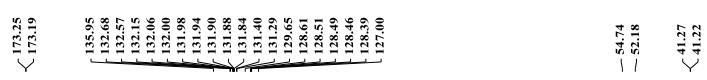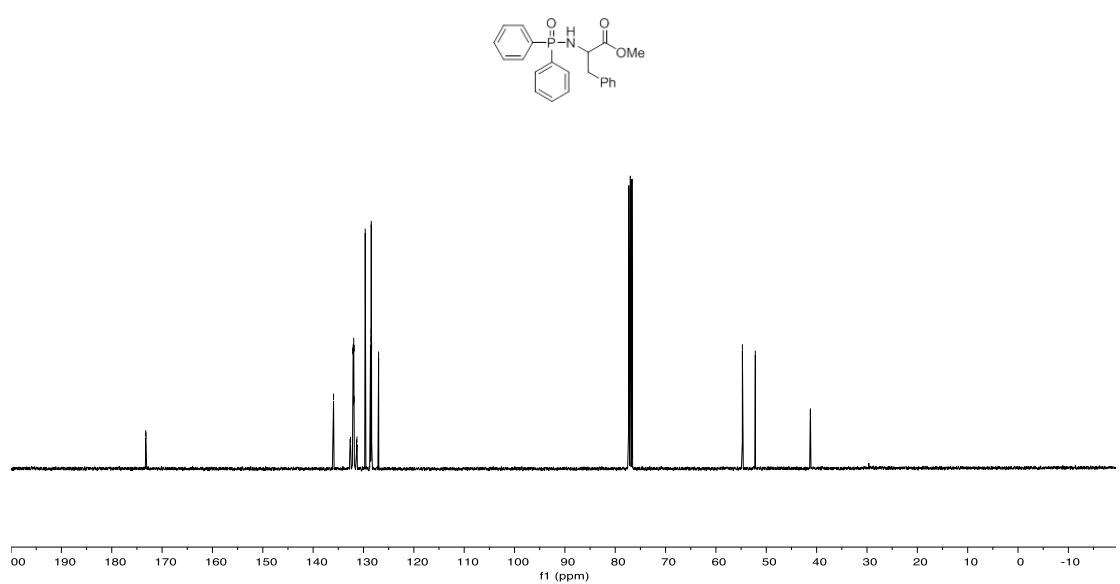

- 20.31

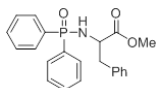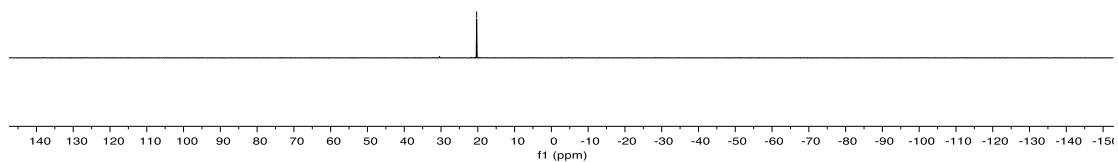

7.87  
7.86  
7.85  
7.84  
7.83  
7.82  
7.77  
7.75  
7.74  
7.73  
7.72  
7.71  
7.44  
7.43  
7.43  
7.43  
7.42  
7.42  
7.42  
7.41  
7.33  
7.32  
7.32  
7.32  
7.31  
7.31  
7.30  
7.29  
7.29  
7.28  
7.28  
7.28  
7.27  
7.26  
7.26  
7.26  
7.25  
7.16  
7.15  
7.14  
7.14  
7.14  
7.13  
5.13  
4.99  
4.99  
4.97

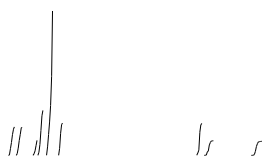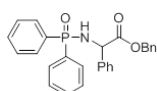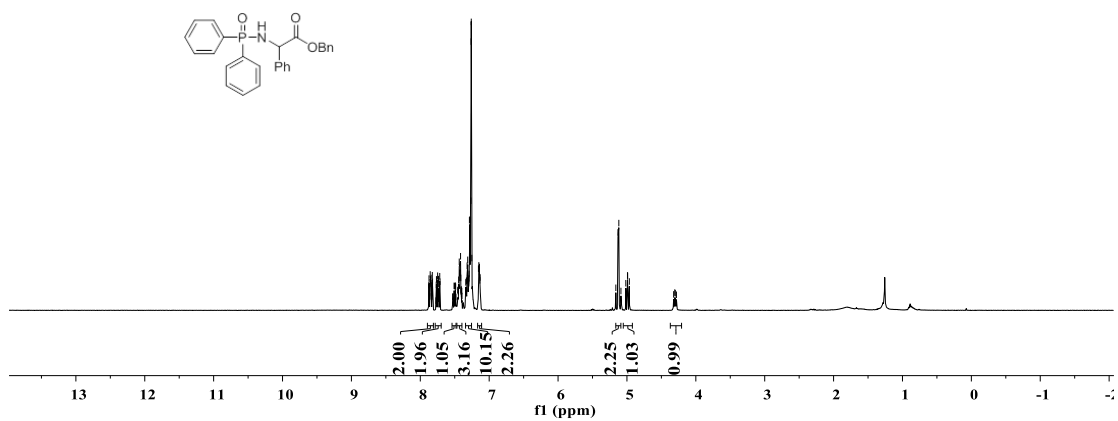

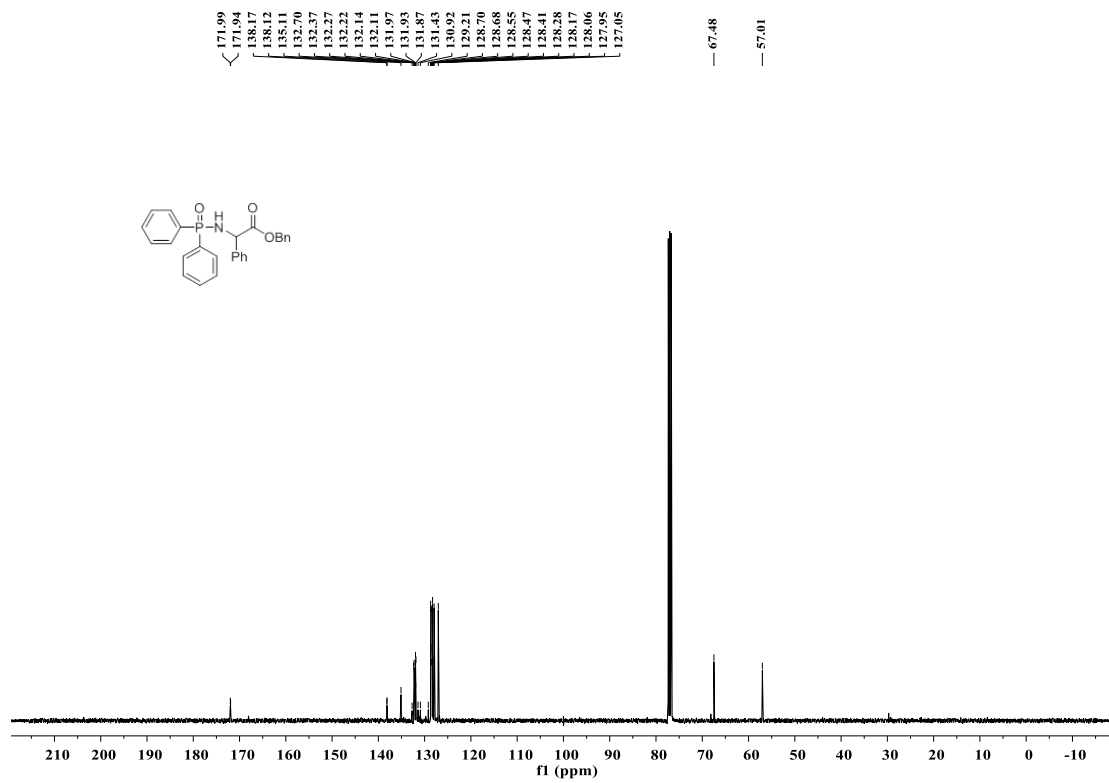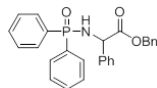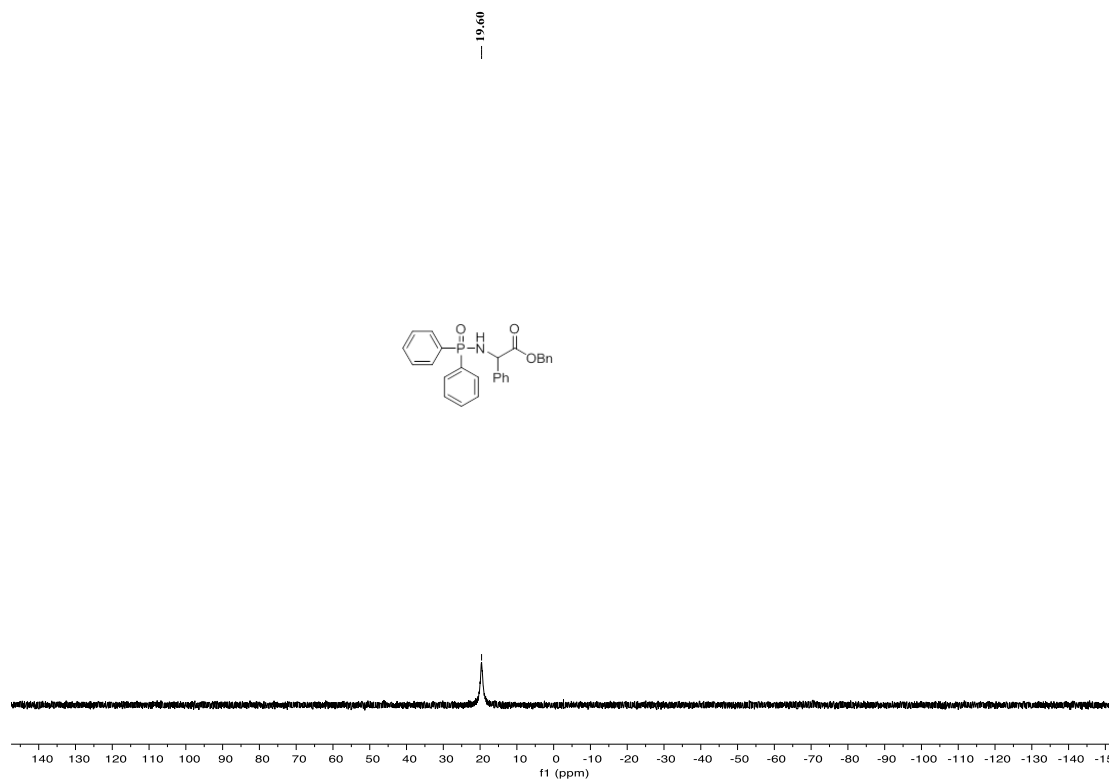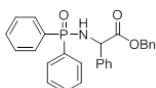

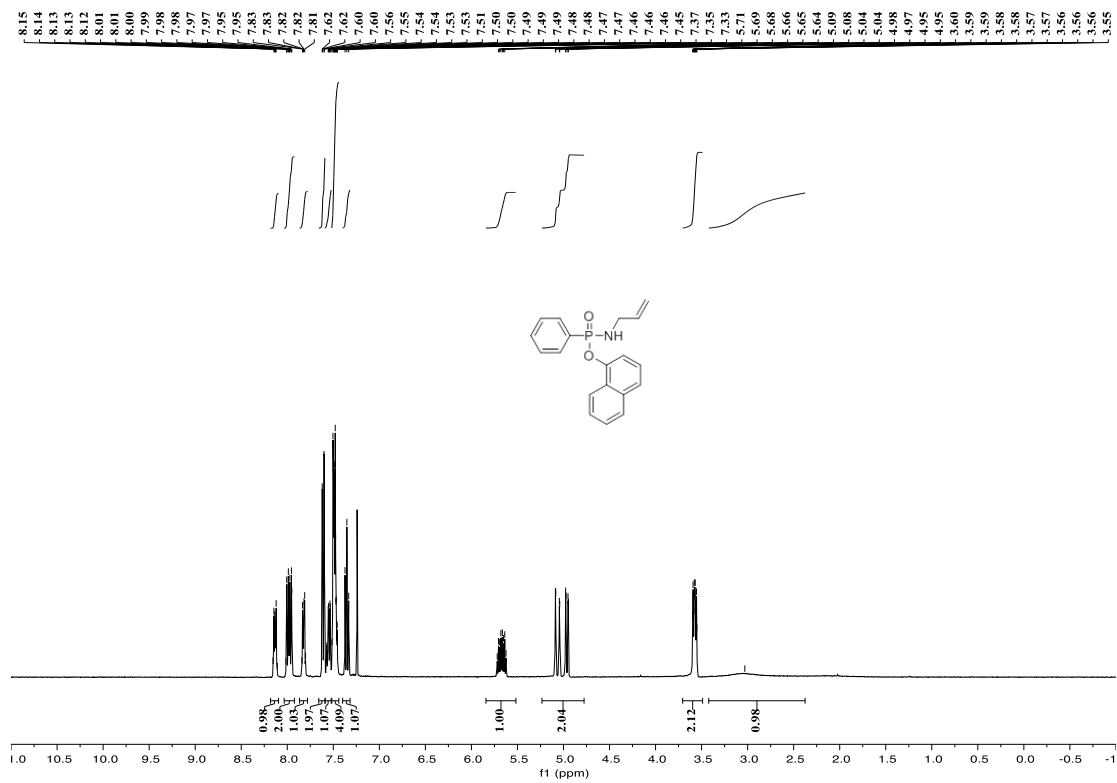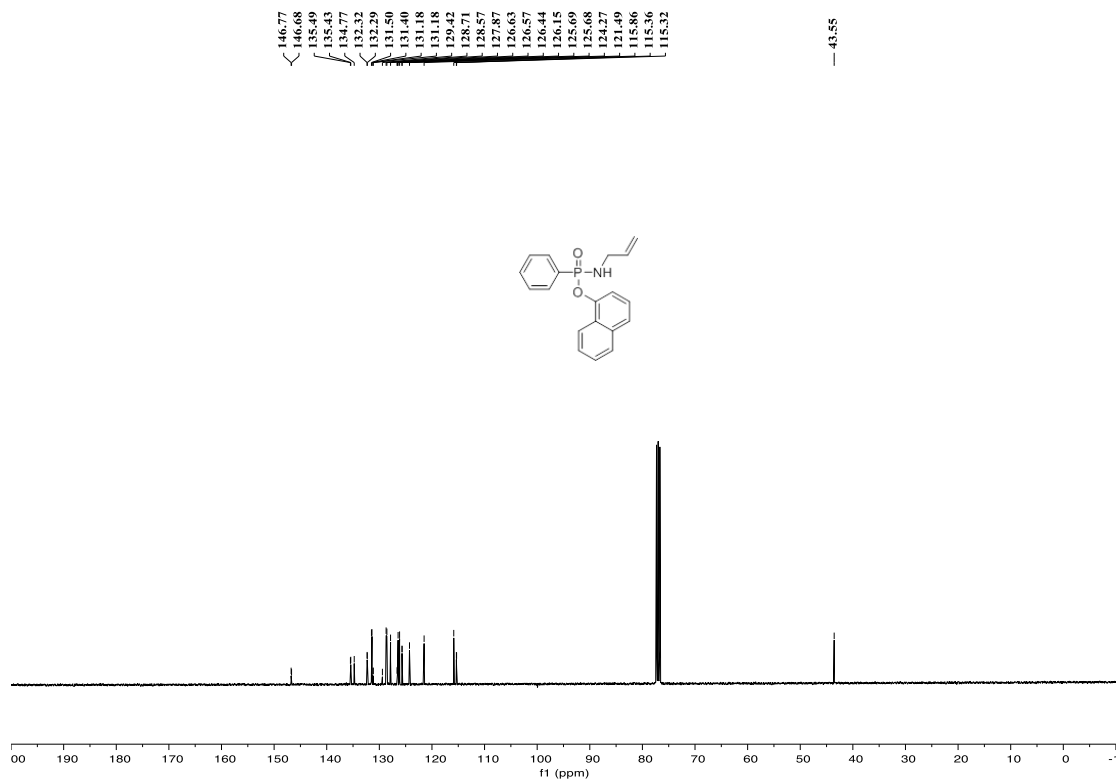

- 17.80

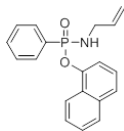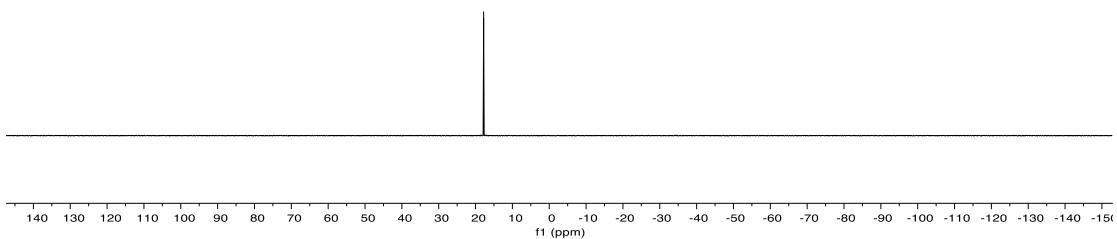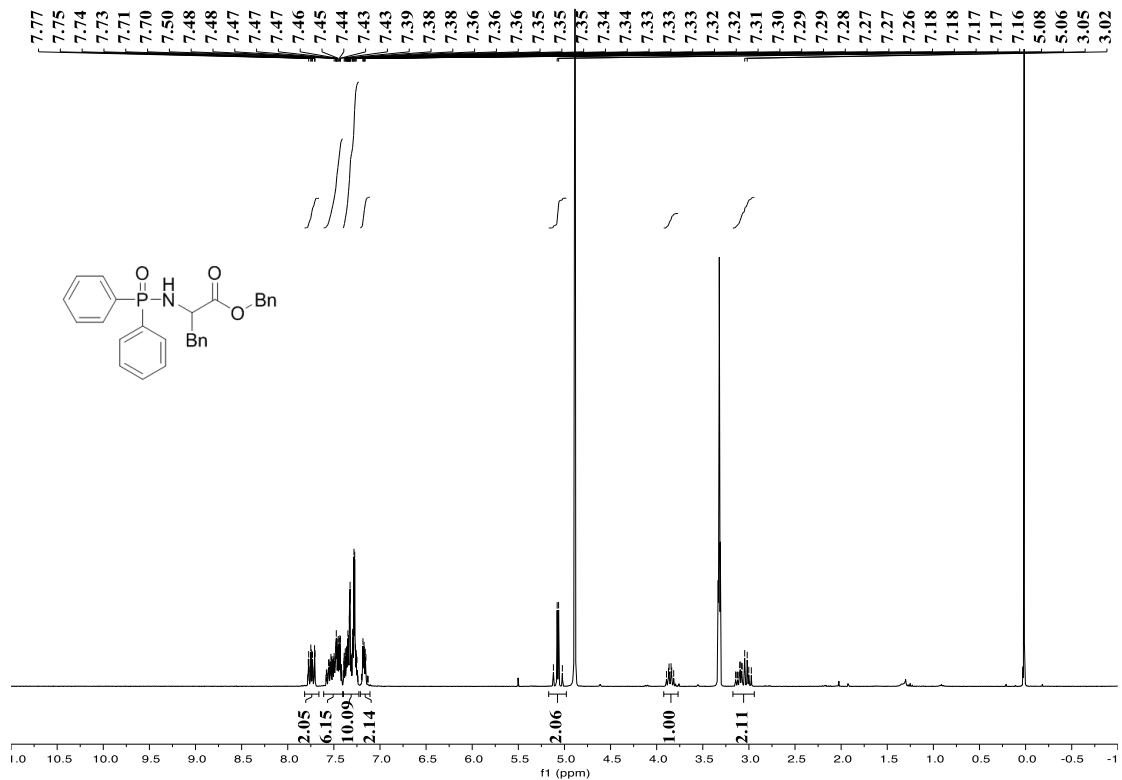

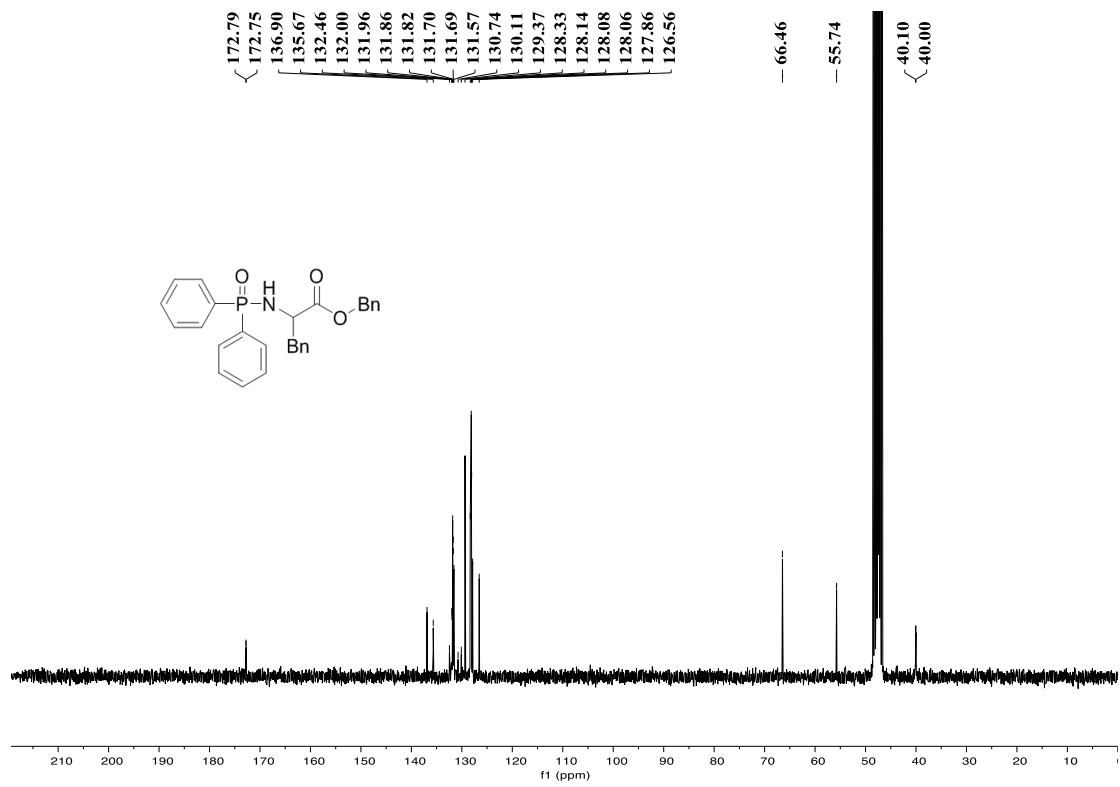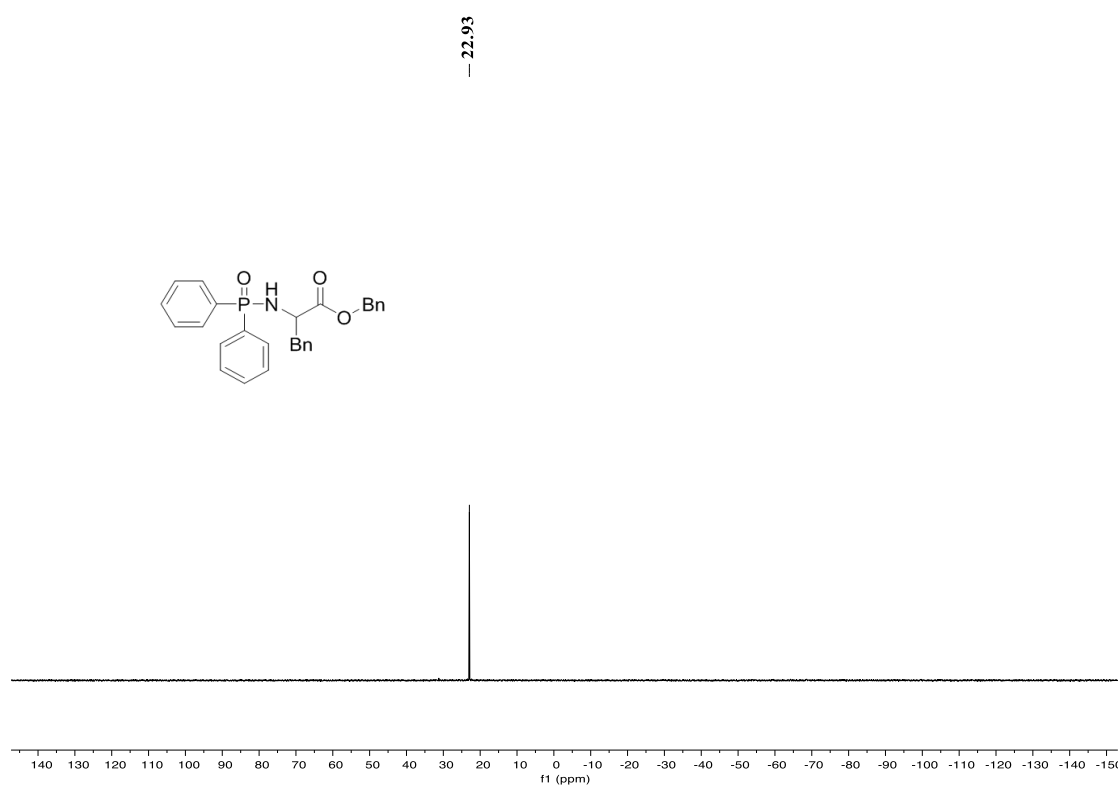



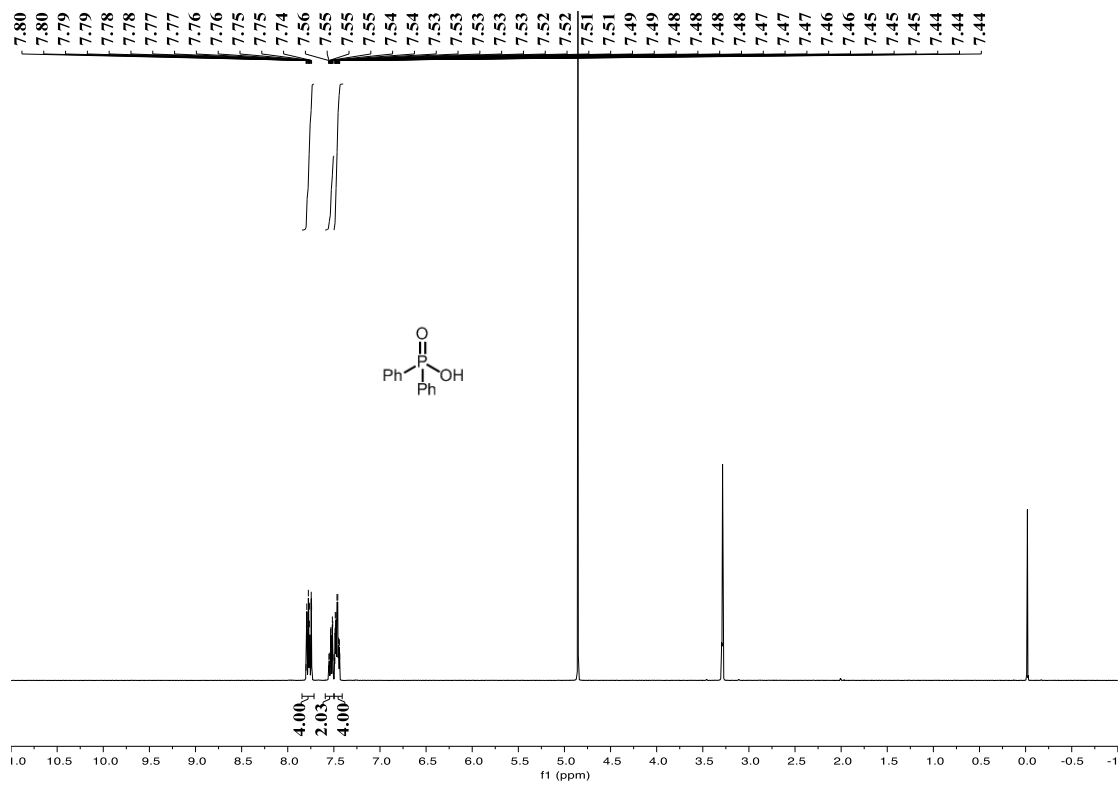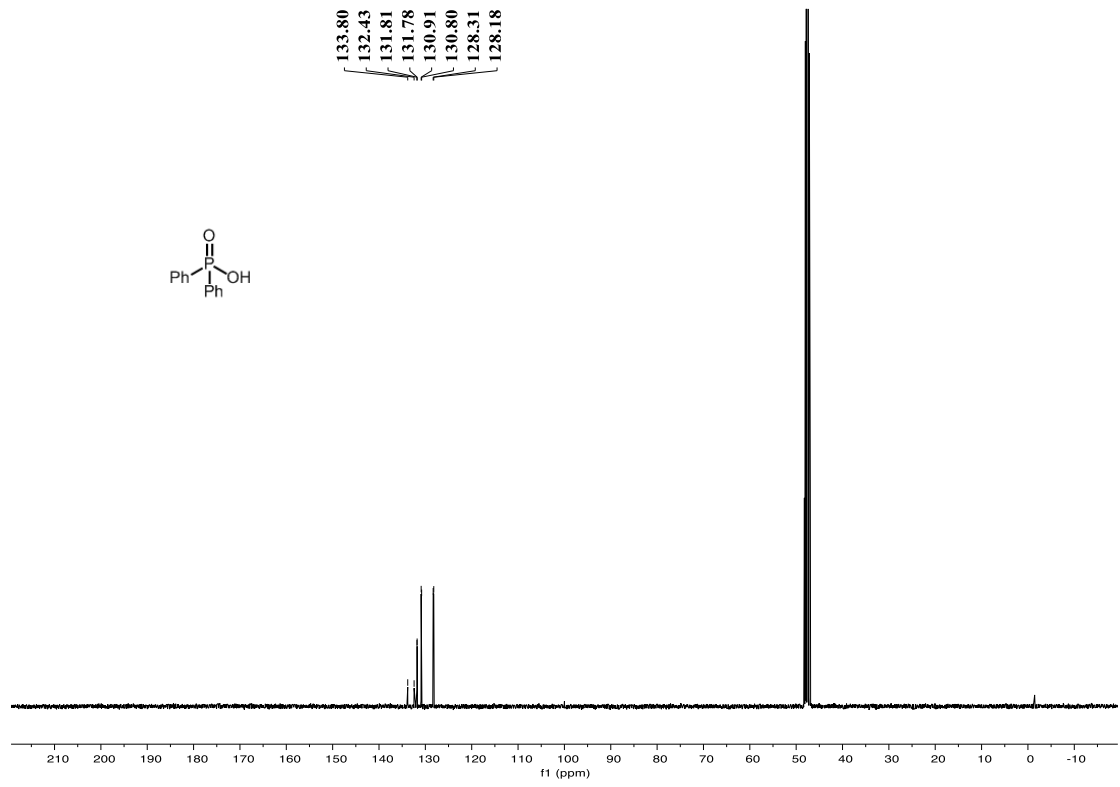

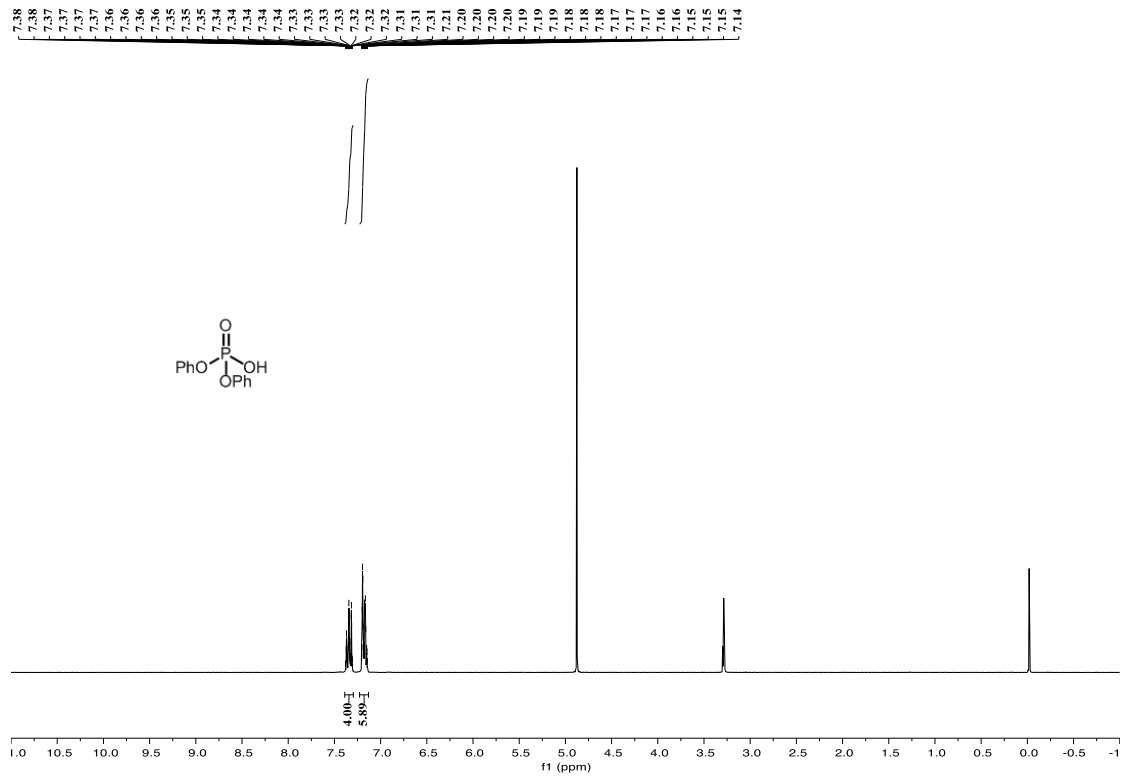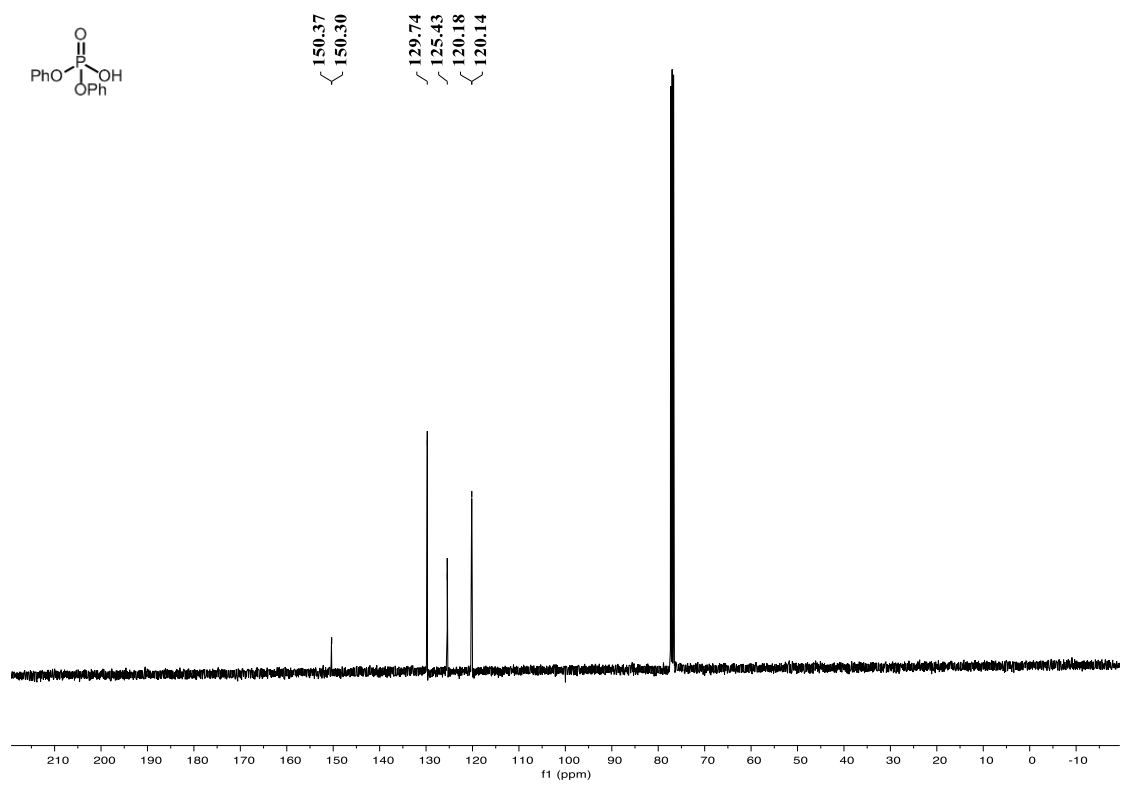

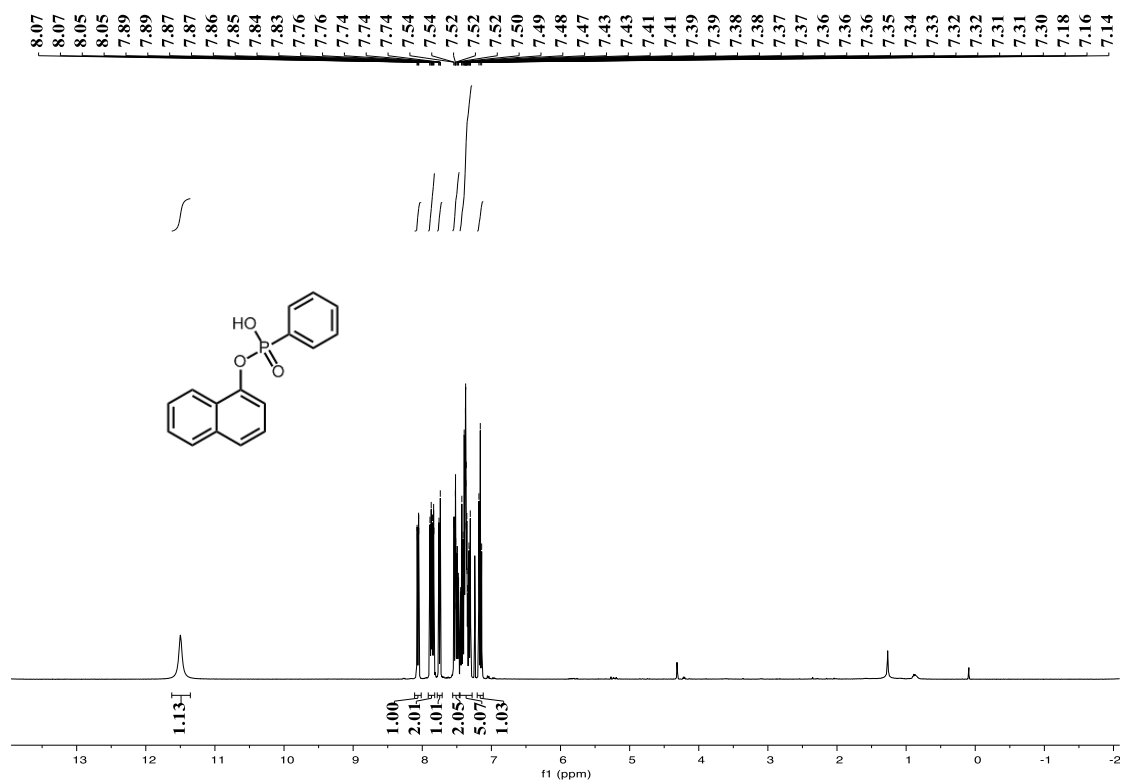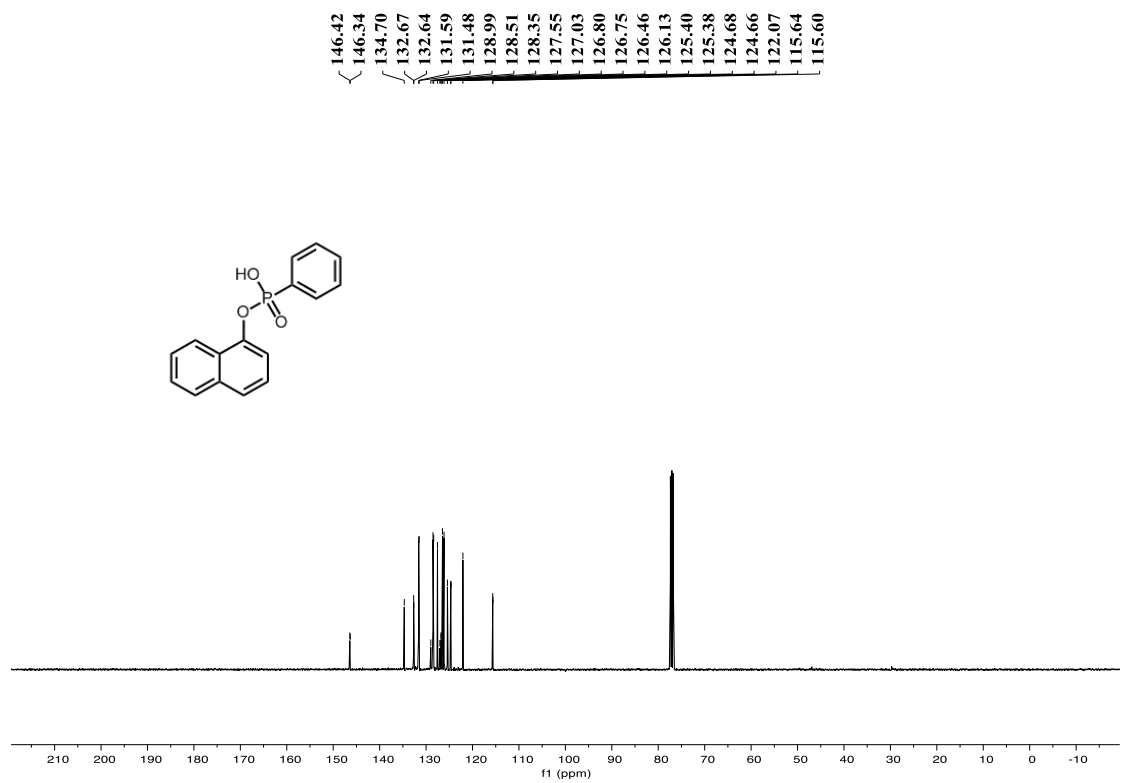

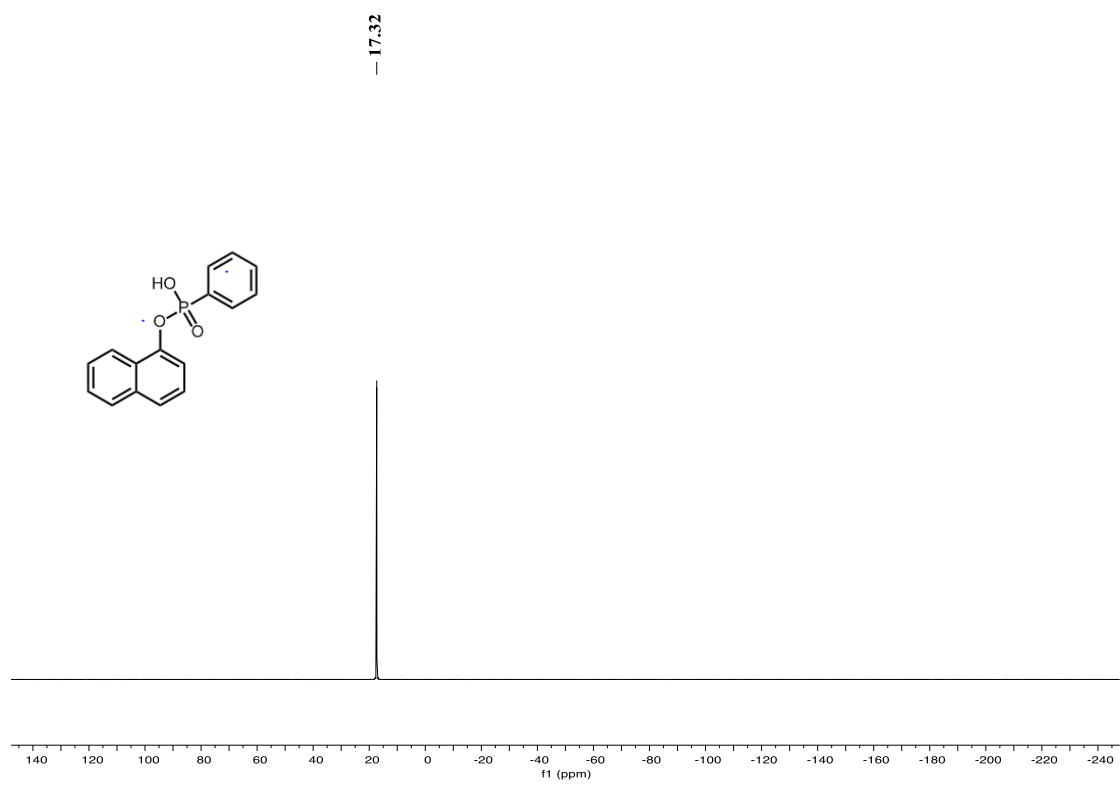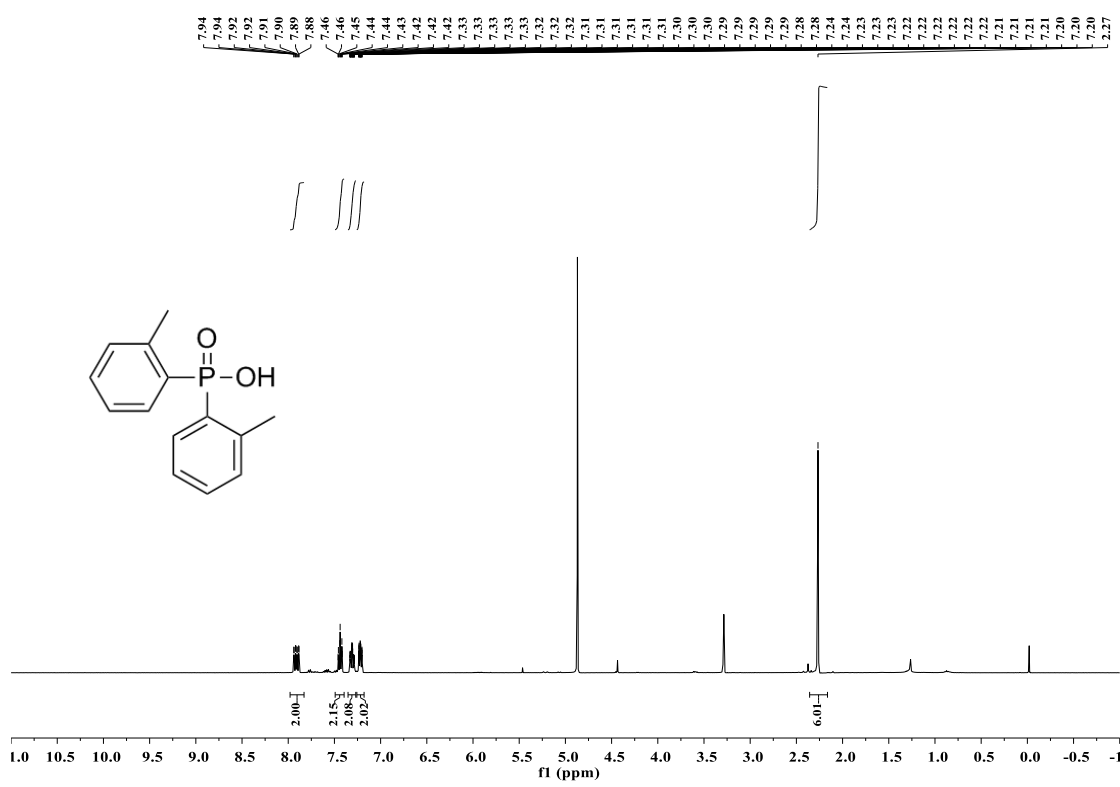

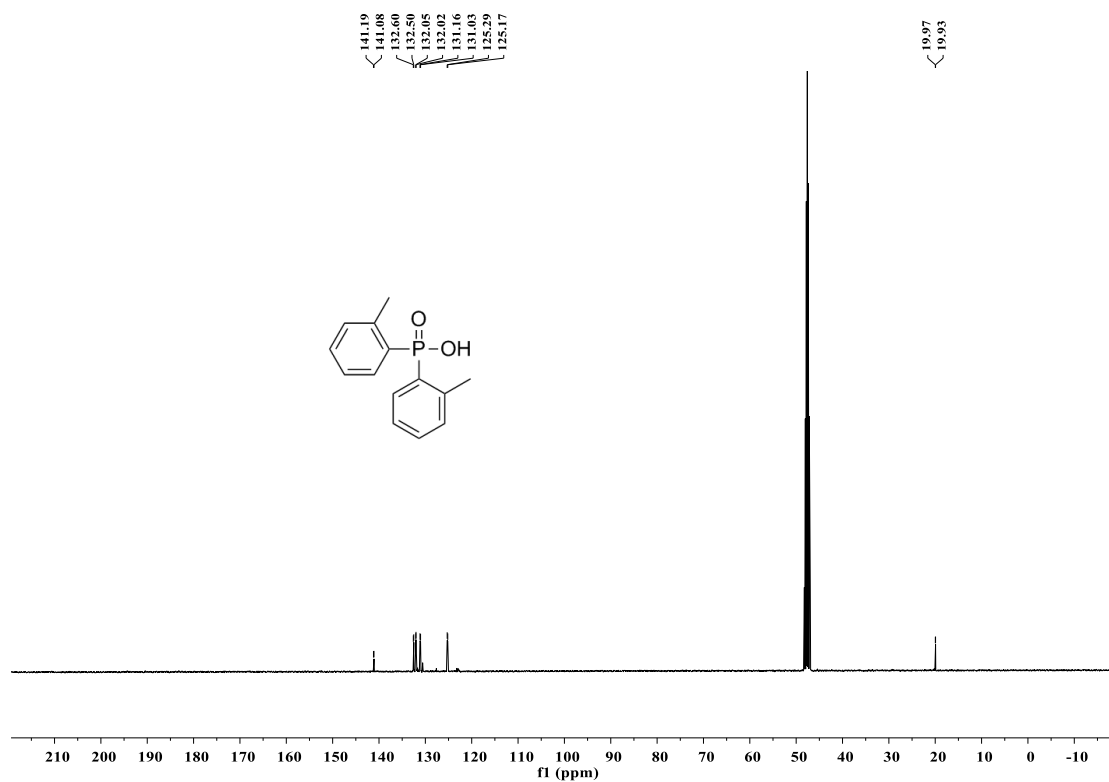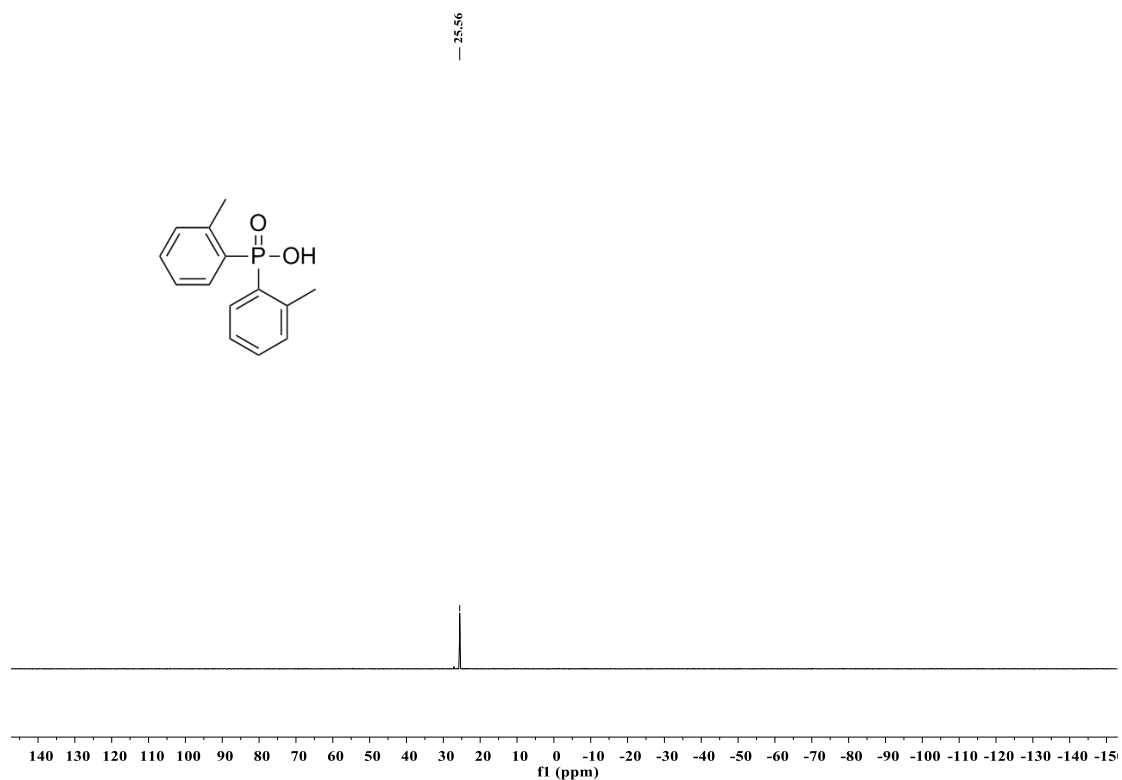

Reference;

1. M. Hatano, T. Miyamoto and K. Ishihara, *Org. Lett.*, 2007, **9**, 4535-4538.
2. B. Burns, N. Paul King, H. Tye, J. R. Studley, M. Gamble and M. Wills, *J. Chem. Soc., Perkin Trans.1*, 1998, 1027-1038.

- 3 A. Martínez-Asencio, D. J. Ramón and M. Yus, *Tetrahedron*, 2011, **67**, 3140-3149.
- 4 C. Shen, G. Yang and W. Zhang, *Org. Lett.*, 2013, **15**, 5722-5725.
- 5 N. A. Bondarenko, A. V. Kharlamov and A. G. Vendilo, *Russ. Chem. Bull.*, 2009, **58**, 1872-1885.
- 6 A. Brück, W. Kuchen and W. Peters, *Phosphorus, Sulfur Silicon Relat. Elem.*, 1995, **107**, 129-133.
- 7 C. R. Graves, K. A. Scheidt and S. T. Nguyen, *Org. Lett.*, 2006, **8**, 1229-1232.
- 8 V. Moodley, L. Mthethwa, M. N. Pillay, B. Omondi and W. E. van Zyl, *Polyhedron*, 2015, **99**, 87-95.
- 9 A. M. Z. Slawin, J. Wheatley and J. D. Woollins, *Eur. J. Inorg. Chem.*, 2005, **2005**, 713-720.
- 10 D. A. Erzunov, G. V. Latyshev, A. D. Averin, I. P. Beletskaya and N. V. Lukashev, *Eur. J. Org. Chem.*, 2015, **2015**, 6289-6297.
- 11 B. Wahl, A. Cabré, S. Woodward and W. Lewis, *Tetrahedron Lett.*, 2014, **55**, 5829-5831.
- 12 C. S. Jones, S. D. Bull and J. M. J. Williams, *Org. Biomol. Chem.*, 2016, **14**, 8452-8456.
- 13 M. E. Masri and K. D. Berlin, *Org. Prep. Proced. Int.*, 1995, **27**, 161-169.
- 14 B. M. Trost, M. C. Ryan, M. Rao and T. Z. Markovic, *J. Am. Chem. Soc.*, 2014, **136**, 17422-17425.
- 15 S. Kan, Y. Jin, X. He, J. Chen, H. Wu, P. Ouyang, K. Guo and Z. Li, *Polym. Chem.*, 2013, **4**, 5432-5439.
- 16 Y. Hao, D. Wu, R. Tian, Z. Duan and F. Mathey, *Dalton Trans.*, 2016, **45**, 891-893.
- 17 I. E. Nifant'ev, A. N. Tavgorkin, S. y. A. Korchagina, I. F. Gavrilenko, N. N. Glebova, N. N. Kostitsyna, V. A. Yakovlev, G. N. Bondarenko and M. P. Filatova, *Appl. Catal., A*, 2014, **478**, 219-227.
